# Supplementary material for: Combined experimental and computational study of Al2O3 catalyzed transamidation of secondary amides with amines
Source: Royal Society of Chemistry journal article supplement (doi:10.1039/d2ra00450j), 2022-01-01
Supplement: d2ra00450j1.pdf [file d2ra00450j1.pdf]

## Combined Experimental and Computational Study of Al<sub>2</sub>O<sub>3</sub> Catalyzed Transamidation of Secondary Amides with Amines.

Md. Ayub Ali,<sup>a\*</sup> Ashutosh Nath,<sup>b</sup> Md. Midul Islam,<sup>a</sup> Sharmin Binte Shaheed,<sup>a</sup> and Ifat Nur Dibbo<sup>a</sup>

### AUTHOR INFORMATION

#### Corresponding Author

**Md. Ayub Ali<sup>a</sup>** -Catalysis and Organic Synthesis Laboratory, Department of Chemistry, Bangladesh University of Engineering and Technology, Dhaka-1000, Bangladesh;  
e-mail : [shuvro070@chem.buet.ac.bd](mailto:shuvro070@chem.buet.ac.bd); ORCID: <https://orcid.org/0000-0002-0915-7771>

#### Authors

**Ashutosh Nath<sup>b</sup>** - Department of Chemistry, University of Massachusetts Boston, MA 02125-3393, USA; e-mail: [ashutosh.nath001@umb.edu](mailto:ashutosh.nath001@umb.edu); ORCID: <https://orcid.org/0000-0001-8302-0493>

**Md. Midul Islam<sup>a</sup>** -Catalysis and Organic Synthesis Laboratory, Department of Chemistry, Bangladesh University of Engineering and Technology, Dhaka-1000, Bangladesh; e-mail: [midulislamchembuet@gmail.com](mailto:midulislamchembuet@gmail.com)

**Sharmin Binte Shaheed<sup>a</sup>** -Catalysis and Organic Synthesis Laboratory, Department of Chemistry, Bangladesh University of Engineering and Technology, Dhaka-1000, Bangladesh.

**Ifat Nur Dibbo<sup>a</sup>** -Catalysis and Organic Synthesis Laboratory, Department of Chemistry, Bangladesh University of Engineering and Technology, Dhaka-1000, Bangladesh.

### Supporting information

| Table of Contents:                                     | Page No. |
|--------------------------------------------------------|----------|
| 1. Synthesis of N-Phenyl Benzamide .....               | S2       |
| 2. Synthesis of N-(o-methyl) Phenyl Benzamide .....    | S3       |
| 3. Synthesis of N-n-Octyl Benzamide .....              | S4       |
| 4. Synthesis of N-(m-methyl) Phenyl Benzamide .....    | S5       |
| 5. Synthesis of N-Benzyl Benzamide .....               | S6       |
| 6. Catalyst Screening .....                            | S7       |
| 7. Solvent Screening .....                             | S8       |
| 8. Reusability of Al <sub>2</sub> O <sub>3</sub> ..... | S9       |
| 9. Optimize structure of Compounds 1-5 .....           | S10      |
| 10. DFT Calculation Data .....                         | S11      |
| 11. Spectrum of Compound 1 .....                       | S13      |
| 12. Spectrum of Compound 2 .....                       | S19      |
| 13. Spectrum of Compound 3 .....                       | S25      |
| 14. Spectrum of Compound 4 .....                       | S32      |
| 15. Spectrum of Compound 5 .....                       | S38      |

## 1. Synthesis of N-Phenyl Benzamide

For synthesis of N-Phenyl Benzamide, N- Methyl Benzamide (1 mmol) and aniline (1 mmol) were taken in a RB flask containing 5 mol%  $\text{Al}_2\text{O}_3$  and then added 5 mL Triethyl amine in the mixture. This reaction mixture was heated on hot plate around at 100 °C for 30 h in a sand bath with continuous stirring of magnetic bar at 300 rpm. The progress of the reaction was monitored by TLC with n-hexane and chloroform. Completion of the reaction was confirmed by TLC. After the completion of the reaction, 4 ml 2-propanol was added to dissolve amides mixture. Then,  $\text{Al}_2\text{O}_3$  was separated from the mixture by centrifugation followed by washing with acetone and dried at 100°C for 3 h. The recovered  $\text{Al}_2\text{O}_3$  was reused for three cycles without a marked decrease in the yield of the product. The solvent was removed from mixture by rotatory evaporator. Finally, the amide was purified by column chromatography with chloroform and n-hexane and recrystallization separation technique with ethanol and water. For catalyst screening, solvent screening and temperature screening same reaction procedure were performed.

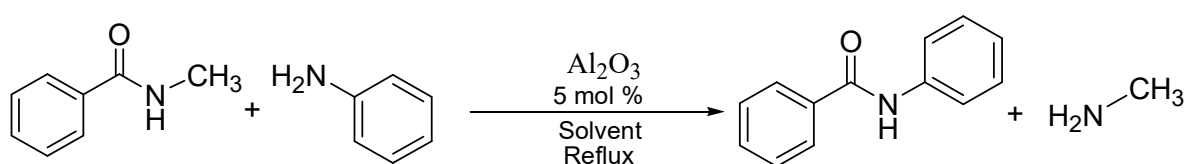

**Scheme S1: Synthesis of N-Phenyl Benzamide.**

- Molecular weight : 197 g/mol
- Molecular formula :  $\text{C}_{13}\text{NOH}_{11}$
- Solubility : Soluble in Chloroform.
- FT-IR ( $\nu$  KBr) : 3347, 3055, 1659, 1536, 1439, 1659, 1075  $\text{cm}^{-1}$
- <sup>1</sup>H-NMR (400 MHz,  $\text{CDCl}_3$ ) :  $\delta$  8.02 (br s, 1H, -NH), 7.088(m, 2H), 7.67 (m, 2H), 7.48 (t, 1H), 7.38 (t, 2H), 7.27(m, 2H), 7.17 (t, 1H)
- <sup>13</sup>C-NMR (100 MHz,  $\text{CDCl}_3$ ) :  $\delta$  165.895 (1C, C=O), 137.969 (1C), 135.010 (1C), 131.844 (1C), 129.100-129.438 (2C), 128.783-129.074 (2C), 127.080 (2C), 124.550 (1C), 120.30 (2C)

## 2. Synthesis of N-(o-methyl) Phenyl Benzamide

For synthesis of N-(o-methyl)Phenyl Benzamide, N- Methyl Benzamide (1 mmol) and o-Toluedine (1 mmol) were taken in a RB flask containing 5 mol%  $\text{Al}_2\text{O}_3$  and then added 5 mL Triethyl amine in the mixture. This reaction mixture was heated on hot plate around at 100 °C for 30 hrs in a sand bath with continuous stirring of magnetic bar at 300 rpm. The progress of the reaction was monitored by TLC with n-hexane and chloroform. Completion of the reaction was confirmed by TLC. After the completion of the reaction, 4 ml 2-propanol was added to dissolve amides mixture. Then,  $\text{Al}_2\text{O}_3$  was separated from the mixture by centrifugation followed by washing with acetone and dried at 100°C for 3 hrs. The recovered  $\text{Al}_2\text{O}_3$  was reused for three cycles without a marked decrease in the yield of the product. The solvent was removed from mixture by rotatory evaporator. Finally, the amide was purified by column chromatography with chloroform and n-hexane and recrystallization separation technique with ethanol and water. For catalyst screening, solvent screening and temperature screening same reaction procedure were performed.

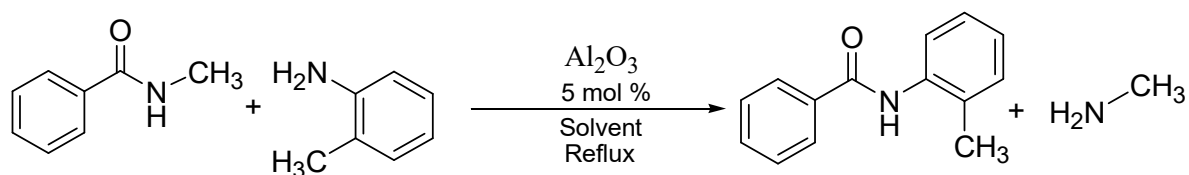

**Scheme S2: Synthesis of N-(o-methyl)Phenyl Benzamide.**

- Molecular weight : 212 g/mol
- Molecular formula :  $\text{C}_{14}\text{NOH}_{14}$
- Solubility : Soluble in Chloroform.
- FT-IR ( $\nu$  KBr) : 3227, 3060, 1645, 1592, 1434, 1294, 1074 $\text{cm}^{-1}$
- <sup>1</sup>H-NMR (400 MHz,  $\text{CDCl}_3$ ) :  $\delta$  8.067 (br s, 1H, -NH), 7.86-7.88 (m, 2H), 7.53-7.56 (t, 2H), 7.44-7.47 (t, 3H), 7.23-7.28 (m, 2H), 6.69-6.99 (m, 1H), 2.36 (s, 3H)
- <sup>13</sup>C-NMR (100 MHz,  $\text{CDCl}_3$ ) :  $\delta$  165.924 (1C, C=O), 138.989 (1C), 137.913 (1C), 131.764 (1C), 129.391 (1C), 128.86 (1C), 128.729 (2C), 125.401 (1C), 127.092 (2C), 121.031 (1C), 117.462 (1C), 21.51 (1C).

### 3. Synthesis of N-n-Octyl Benzamide

For synthesis of N-n-Octyl Benzamide, N- Methyl Benzamide (1 mmol) and n-Octyl amine (1 mmol) were taken in a RB flask containing 5 mol% Al<sub>2</sub>O<sub>3</sub> and then added 5 mL Triethyl amine in the mixture. This reaction mixture was heated on hot plate around at 100 °C for 30 hrs in a sand bath with continuous stirring of magnetic bar at 300 rpm. The progress of the reaction was monitored by TLC with n-hexane and chloroform. Completion of the reaction was confirmed by TLC. After the completion of the reaction, 4 ml 2-propanol was added to dissolve amides mixture. Then, Al<sub>2</sub>O<sub>3</sub> was separated from the mixture by centrifugation followed by washing with acetone and dried at 100°C for 3 hrs. The recovered Al<sub>2</sub>O<sub>3</sub> was reused for three cycles without a marked decrease in the yield of the product. The solvent was removed from mixture by rotatory evaporator. Finally, the amide was purified by column chromatography with chloroform and n-hexane and recrystallization separation technique with ethanol and water. For catalyst screening, solvent screening and temperature screening same reaction procedure were performed.

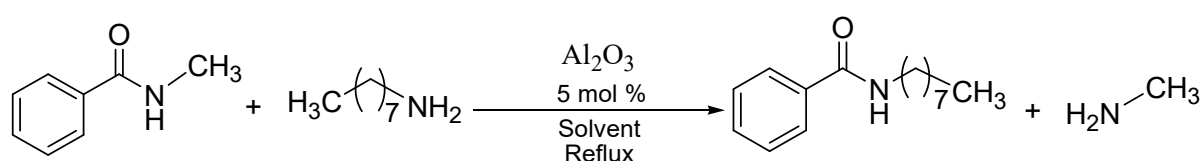

**Scheme S3: Synthesis of N-Octyl Benzamide.**

- Molecular weight : 233 g/mol
- Molecular formula : C<sub>15</sub>NOH<sub>23</sub>
- Solubility : Soluble in Chloroform.
- FT-IR (ν KBr) : 3360, 3058, 1653, 1549, 1493, 1447, 1076cm<sup>-1</sup>
- <sup>1</sup>H-NMR (400 MHz, CDCl<sub>3</sub>) : δ 6.368 (br s, 1H, -NH), 7.77-7.78 (m, 2H), 7.47-7.51 (t, 1H), 7.40-7.44 (t, 2H), 3.42-3.47 (m, 2H), 2.362-2.398 (m, 2H), 1.58-1.65 (m, 2H), 1.28-1.34 (m, 8H), 0.87-.91 (t, 3H)
- <sup>13</sup>C-NMR (100 MHz, CDCl<sub>3</sub>) : δ 167.626 (1C, C=O), 134.811 (1C), 131.313 (1C), 128.525 (1C), 126.889 (1C), 40.181 (1C), 31.806 (1C), 29.675 (1C), 29.225 (1C), 29.308 (1C), 27.029 (1C), 14.097 (1C).

#### 4. Synthesis of N-(m-methyl) Phenyl Benzamide

For synthesis of N-(m-methyl)Phenyl Benzamide, N- Methyl Benzamide (1 mmol) and m-Toluedine (1 mmol) were taken in a RB flask containing 5 mol% Al<sub>2</sub>O<sub>3</sub> and then added 5 mL Triethyl amine in the mixture. This reaction mixture was heated on hot plate around at 100 °C for 30 hrs in a sand bath with continuous stirring of magnetic bar at 300 rpm. The progress of the reaction was monitored by TLC with n-hexane and chloroform. Completion of the reaction was confirmed by TLC. After the completion of the reaction, 4 ml 2-propanol was added to dissolve amides mixture. Then, Al<sub>2</sub>O<sub>3</sub> was separated from the mixture by centrifugation followed by washing with acetone and dried at 100°C for 3 hrs. The recovered Al<sub>2</sub>O<sub>3</sub> was reused for three cycles without a marked decrease in the yield of the product. The solvent was removed from mixture by rotatory evaporator. Finally, the amide was purified by column chromatography with chloroform and n-hexane and recrystallization separation technique with ethanol and water. For catalyst screening, solvent screening and temperature screening same reaction procedure were performed.

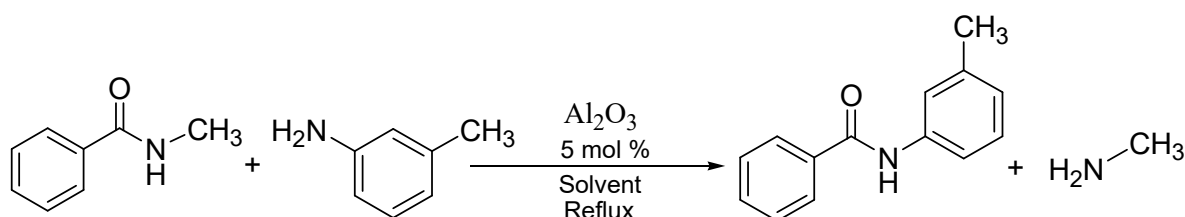

**Scheme S4: Synthesis of N-(o-methyl)Phenyl Benzamide.**

- Molecular weight : 212 g/mol
- Molecular formula : C<sub>14</sub>NOH<sub>14</sub>
- Solubility : Soluble in Chloroform.
- FT-IR (ν KBr) : 3240, 3030, 2829, 1651, 1603, 1526, 1440cm<sup>-1</sup>
- <sup>1</sup>H-NMR (400 MHz, CDCl<sub>3</sub>) : δ 7.722 (br s, 1H, -NH), 7.962-7.982 (m, 1H), 7.907-7.925 (m, 1H), 7.576-7.612 (t, 1H), 7.50-7.54 (m, 3H), 7.24-7.27 (m, 1H), 7.13 (m, 1H), 2.36 (s, 3H)
- <sup>13</sup>C-NMR (100 MHz, CDCl<sub>3</sub>) : δ 165.683 (1C, C=O), 135.789 (1C), 135.039 (1C), 131.885 (1C), 130.591 (1C), 129.244 (1C), 128.873-128.918 (2C), 127.074 (1C), 126.947 (1C), 125.399 (1C), 123.139 (1C), 17.860 (1C).
-

## 5. Synthesis of N-Benzyl Benzamide

For synthesis of N-Benzyl Benzamide, N- Methyl Benzamide (1 mmol) and Benzylamine (1 mmol) were taken in a RB flask containing 5 mol%  $\text{Al}_2\text{O}_3$  and then added 5 mL Triethyl amine in the mixture. This reaction mixture was heated on hot plate around at  $100\text{ }^\circ\text{C}$  for 30 hrs in a sand bath with continuous stirring of magnetic bar at 300 rpm. The progress of the reaction was monitored by TLC with n-hexane and chloroform. Completion of the reaction was confirmed by TLC. After the completion of the reaction, 4 ml 2-propanol was added to dissolve amides mixture. Then,  $\text{Al}_2\text{O}_3$  was separated from the mixture by centrifugation followed by washing with acetone and dried at  $100^\circ\text{C}$  for 3 hrs. The recovered  $\text{Al}_2\text{O}_3$  was reused for three cycles without a marked decrease in the yield of the product. The solvent was removed from mixture by rotatory evaporator. Finally, the amide was purified by column chromatography with chloroform and n-hexane and recrystallization separation technique with ethanol and water. For catalyst screening, solvent screening and temperature screening same reaction procedure were performed.

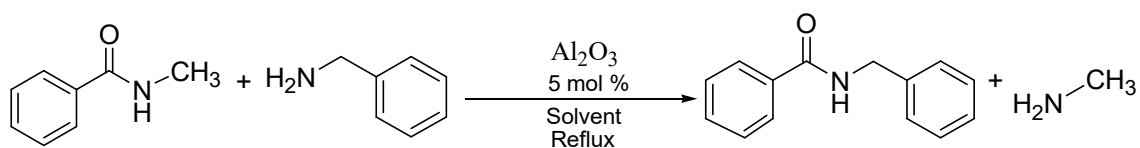

**Scheme S5: Synthesis of N-Benzyl Benzamide.**

- Molecular weight : 212 g/mol
- Molecular formula :  $\text{C}_{14}\text{NOH}_{13}$
- Solubility : Soluble in Chloroform.
- FT-IR ( $\nu$  KBr) : 3329, 3056, 2940, 1639, 1578, 1555, 1492  $\text{cm}^{-1}$
- $^1\text{H-NMR}$  (400 MHz,  $\text{CDCl}_3$ ) :  $\delta$  9.270 (br s, 1H, -NH), 5.150 (s, 1H), 4.460 (s, 1H), 6.825-6.834 (m, 2H), 7.396-7.404 (m, 2H), 7.185-7.283 (m, 1H), 8.001-8.183 (m, 2H), 7.597-7.641 (m, 2H), 7.826-7.844 (m, 1H)

## 6. Catalyst Screening

Model reaction:

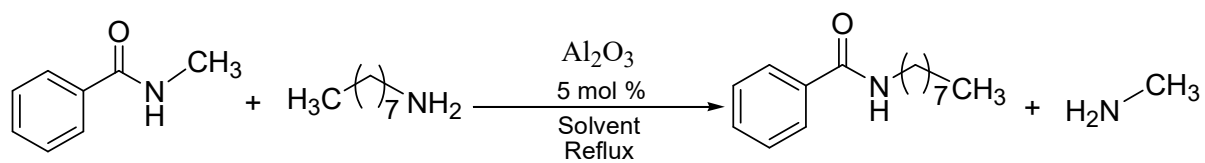

**Table S1: Catalyst screening for model reaction**

| Entry | Catalyst                       | % of Yields |
|-------|--------------------------------|-------------|
| 01    | -                              | 0           |
| 02    | SnO <sub>2</sub>               | 5           |
| 03    | Cu <sub>2</sub> O              | 3           |
| 04    | Al <sub>2</sub> O <sub>3</sub> | 76          |
| 05    | Nb <sub>2</sub> O <sub>5</sub> | 8           |
| 06    | CeO <sub>2</sub>               | 10          |
| 07    | TiO <sub>2</sub>               | 6           |

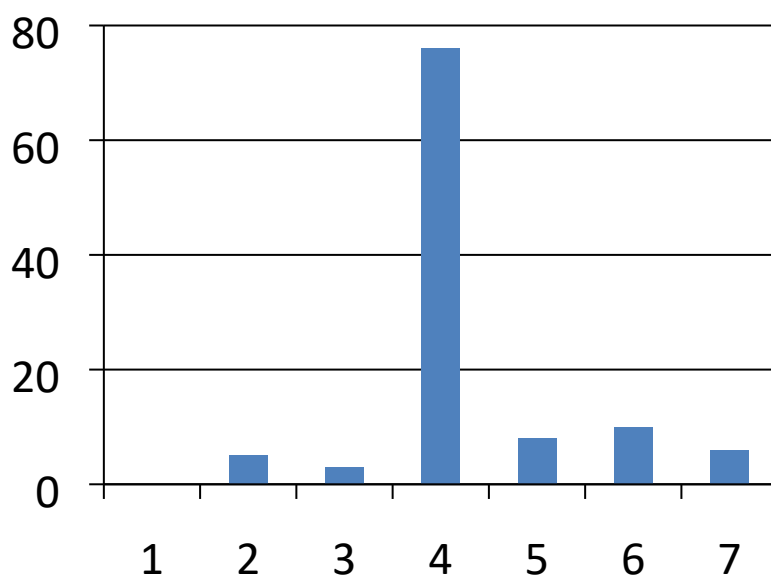

**Figure S1: Catalyst screening for model reaction.**

## 7. Solvent Screening

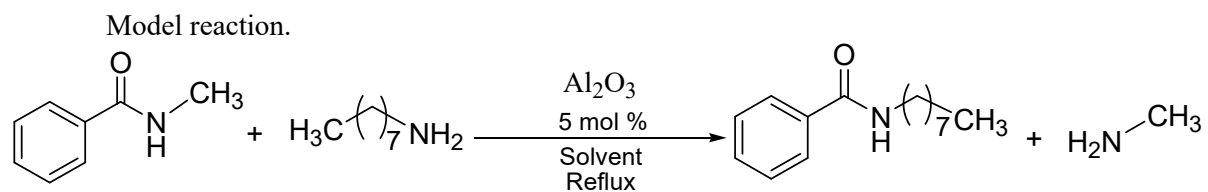

**Table S2: Solvent screening for model reaction**

| Entry | Solvent          | % of Yields |
|-------|------------------|-------------|
| 01    | No solvent       | 0           |
| 02    | <i>O</i> -Xylene | 9           |
| 03    | Benzene          | 5           |
| 04    | Triethylamine    | 76          |
| 05    | Toluene          | 7           |

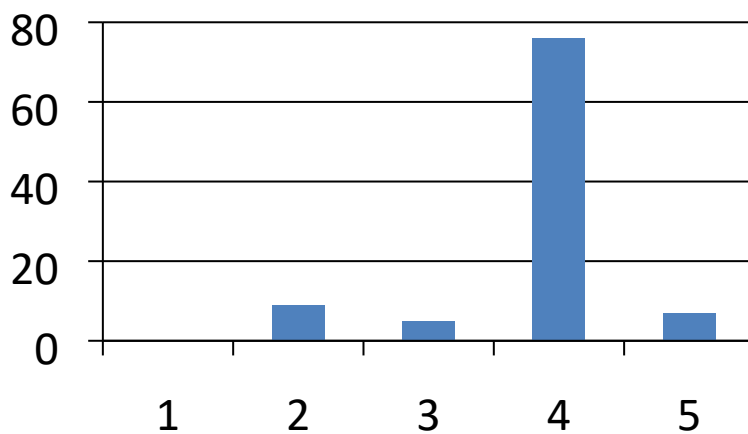

**Figure S2: Solvent screening for model reaction.**



## 8. Reusability of Al<sub>2</sub>O<sub>3</sub>

Model Reaction:

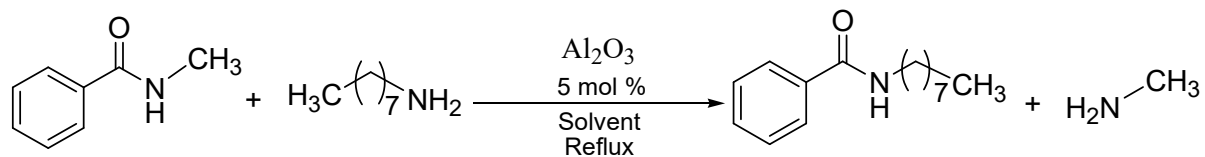

**Table S3: Reusability of Al<sub>2</sub>O<sub>3</sub> for model reaction.**

| Cycle Number | Catalyst                       | % of Yields |
|--------------|--------------------------------|-------------|
| 01           | Al <sub>2</sub> O <sub>3</sub> | 76          |
| 02           |                                | 70          |
| 03           |                                | 63          |
| 04           |                                | 41          |

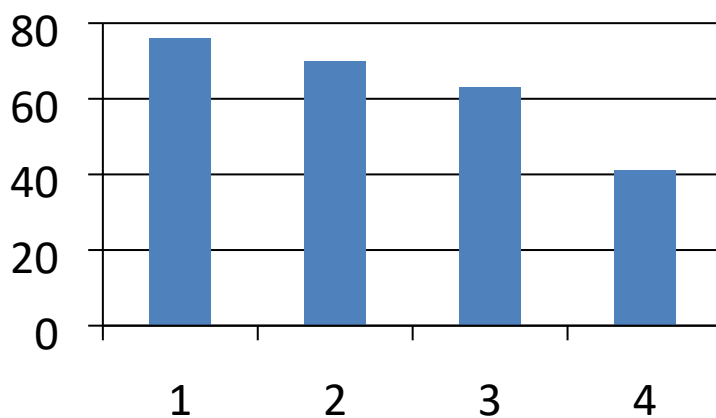

**Figure S3: Reusability of Al<sub>2</sub>O<sub>3</sub> for model reaction.**

## 9. Optimize structure of Compounds 1-5

Table S4: Optimize Structure of Compounds 1-5

| Compnd | Optimize ball and bond type Structure                                               | Optimize tube Structure                                                              | Optimize Energy (Hartee) |
|--------|-------------------------------------------------------------------------------------|--------------------------------------------------------------------------------------|--------------------------|
| 1      | 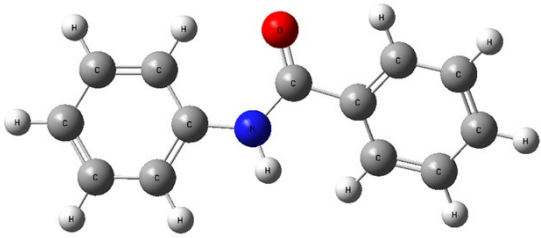   |    | -624.166                 |
| 2      |   |   | -663.353                 |
| 3      |  |  | -706.818                 |
| 4      |  |  | -663.355                 |
| 5      |  |  | -663.351                 |

## 10. DFT Calculation Data

Table S5: Using Catalyst Al<sub>2</sub>O<sub>3</sub>

| Calculation Method | Basis Set      | Compounds                                              | Energy (Hartree) | Relative Energy |
|--------------------|----------------|--------------------------------------------------------|------------------|-----------------|
| RB3LYP             | 6-311+G (D, P) | Amides                                                 | -440.380         | 0.000           |
| RB3LYP             | 6-311+G (D, P) | Amines-1                                               | -287.631         | 152.749         |
| RB3LYP             | 6-311+G (D, P) | Catalyst Al <sub>2</sub> O <sub>3</sub>                | -710.733         | -270.353        |
| RB3LYP             | 6-311+G (D, P) | Solvent N(C <sub>2</sub> H <sub>5</sub> ) <sub>3</sub> | -174.528         | 265.853         |
| RB3LYP             | 6-311+G (D, P) | TS1                                                    | -1438.224        | -997.844        |
| RB3LYP             | 6-311+G (D, P) | TS2                                                    | -1603.740        | -1163.359       |
| RB3LYP             | 6-311+G (D, P) | Product 1                                              | -624.166         | -191.786        |

Table S6: Using Catalyst Nb<sub>2</sub>O<sub>5</sub>

| Calculation Method | Basis Set      | Compounds                                              | Energy (Hartree) | Relative Energy |
|--------------------|----------------|--------------------------------------------------------|------------------|-----------------|
| RB3LYP             | 6-311+G (D, P) | Amides                                                 | -440.380         | 0.000           |
| RB3LYP             | 6-311+G (D, P) | Amines-1                                               | -287.631         | 152.749         |
| RB3LYP             | 6-311+G (D, P) | Catalyst Nb <sub>2</sub> O <sub>5</sub>                | -7843.992        | -7403.612       |
| RB3LYP             | 6-311+G (D, P) | Solvent N(C <sub>2</sub> H <sub>5</sub> ) <sub>3</sub> | -174.528         | 265.853         |
| RB3LYP             | 6-311+G (D, P) | TS1                                                    | -0.430672        | 439.950         |
| RB3LYP             | 6-311+G (D, P) | TS2                                                    | -8852.090        | -8411.710       |
| RB3LYP             | 6-311+G (D, P) | Product 1                                              | -624.166         | -191.786        |

Total energy plot for compounds 1-5

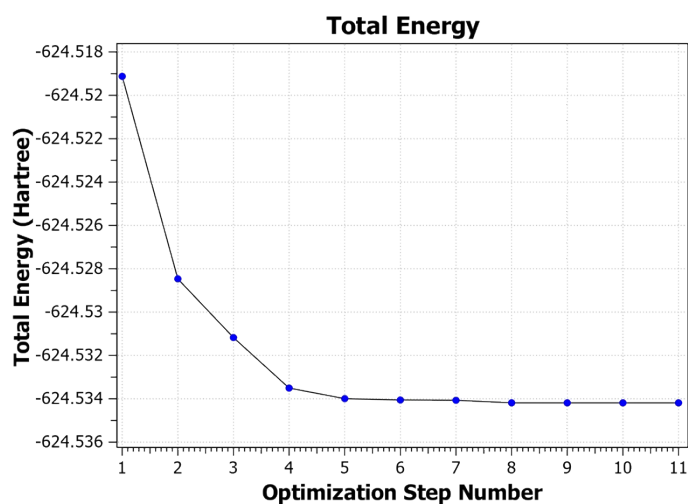

Compound 1

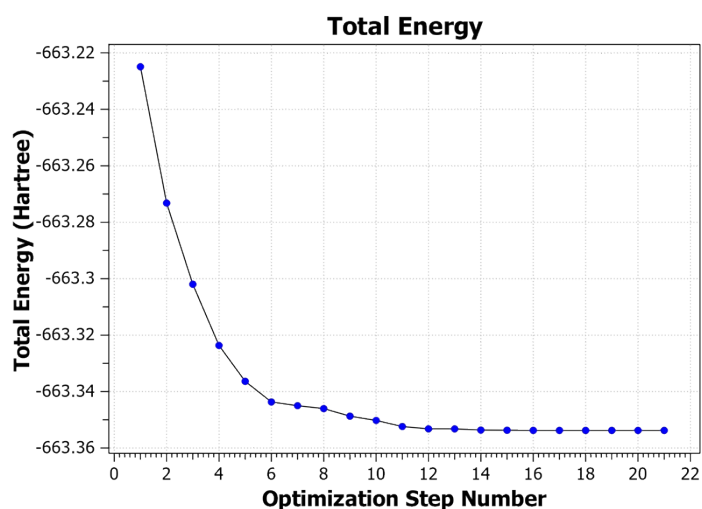

Compound 2

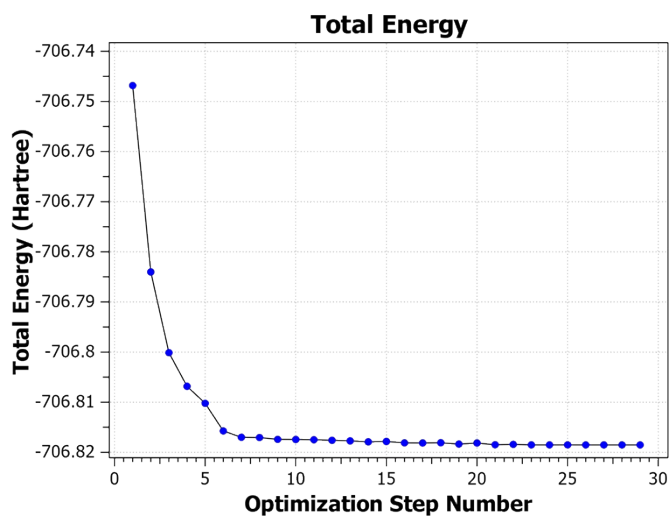

Compound 3

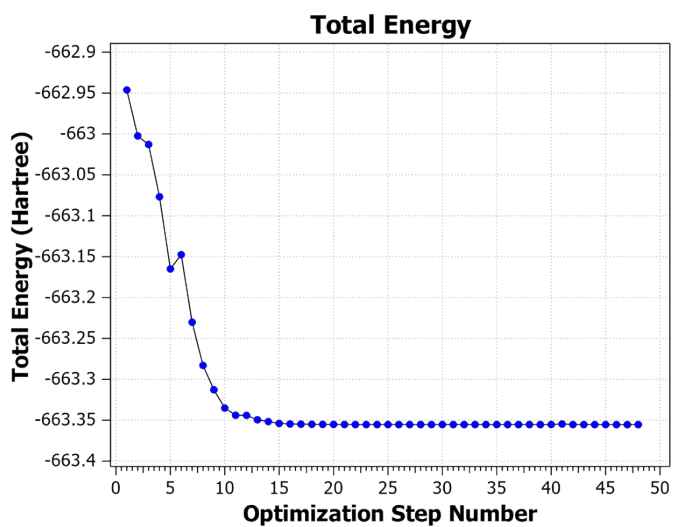

Compound 4

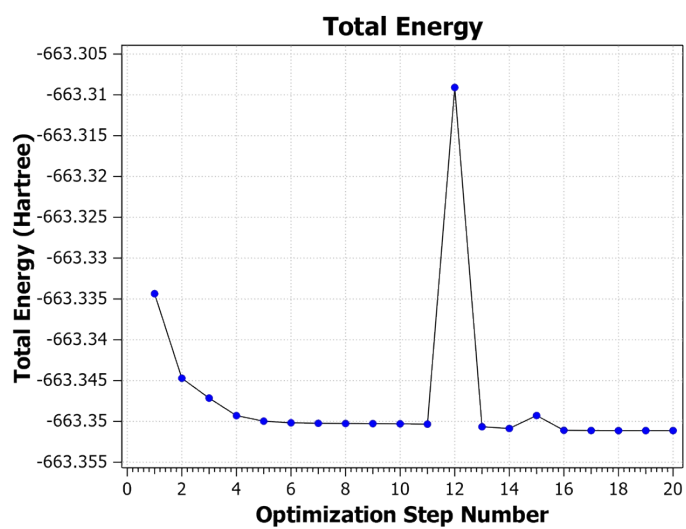

Compound 5

## 11. Spectra of compound 1

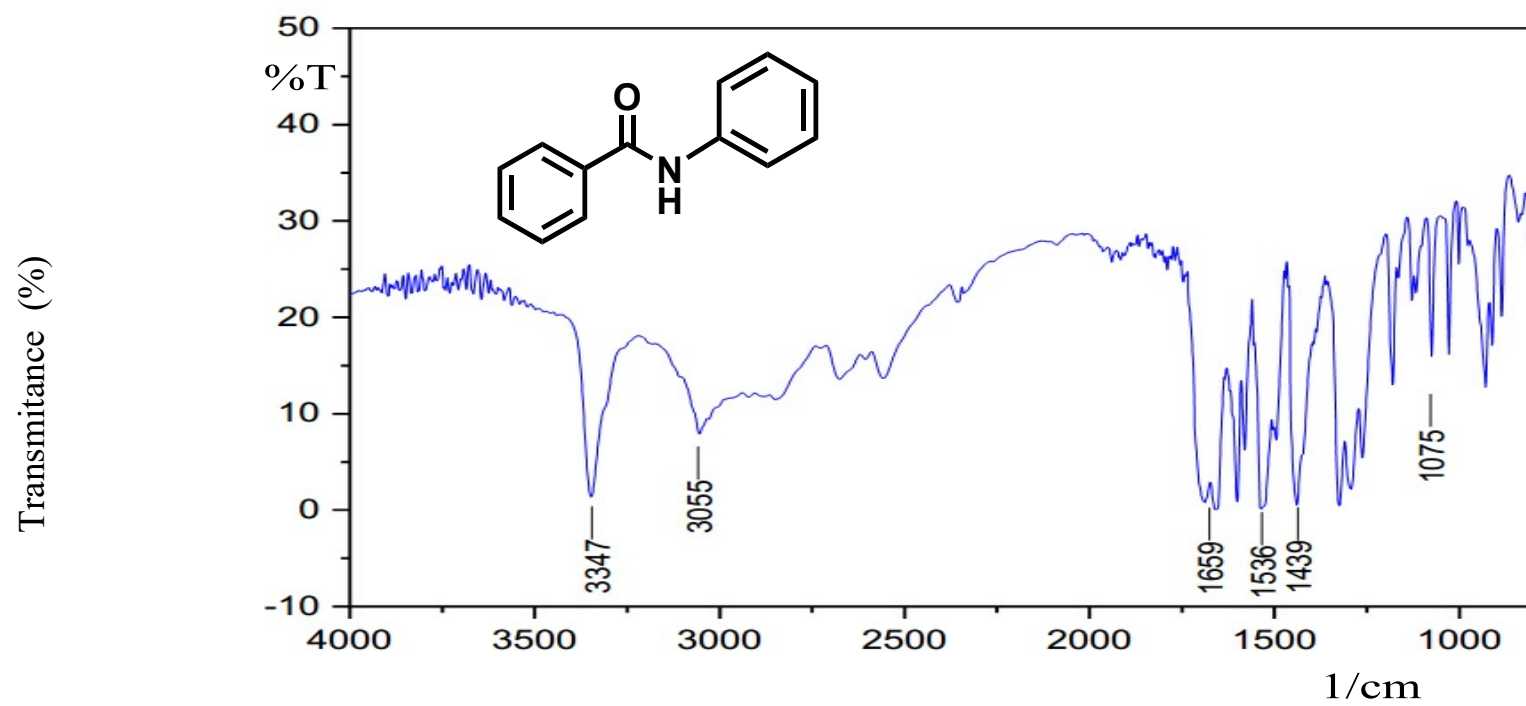

Wave number

Figure S4: FT-IR spectrum of Compound 1

Wazed Miah Science Research Centre (WMSRC)  
 Jahanginagar University  
 Sample: MB  
 Operated by: Md. Emdad Hossain, Scientist

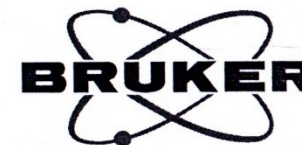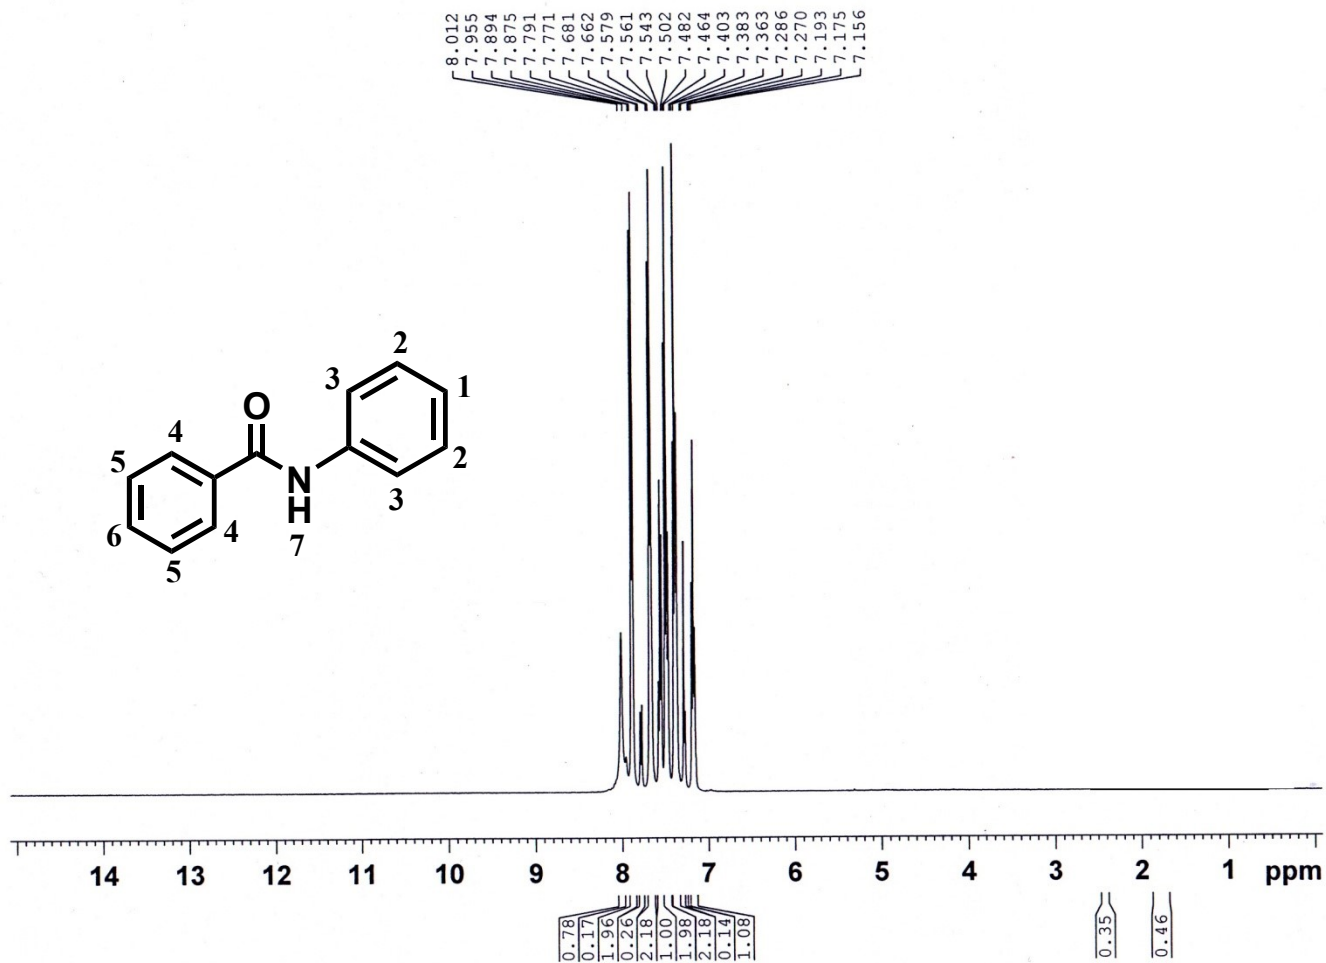

Current Data Parameters  
 NAME BUET\_MB  
 EXPNO 1  
 PROCNO 1

F2 - Acquisition Parameters  
 Date\_ 20200223  
 Time 11.36  
 INSTRUM spect  
 PROBHD 5 mm PABBO BB/  
 PULPROG zg  
 TD 65536  
 SOLVENT CDC13  
 NS 16  
 DS 0  
 SWH 12019.230 Hz  
 FIDRES 0.183399 Hz  
 AQ 2.7262976 sec  
 RG 66.24  
 DW 41.600 usec  
 DE 6.50 usec  
 TE 298.0 K  
 D1 1.00000000 sec  
 TD0 1

===== CHANNEL f1 =====  
 SFO1 400.2340023 MHz  
 NUC1 1H  
 P1 11.20 usec  
 PLW1 12.00000000 W

F2 - Processing parameters  
 SI 131072  
 SF 400.2300000 MHz  
 WDW EM  
 SSB 0  
 LB 1.00 Hz  
 GB 0  
 PC 1.00

Figure S5: <sup>1</sup>H-NMR spectrum of compound 1

Wazed Miah Science Research Centre (WMSRC)  
 Jahanginagar University  
 Sample: MB  
 Operated by: Md. Emdad Hossain, Scientist

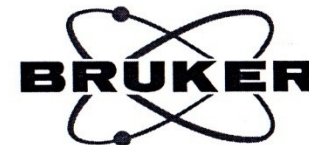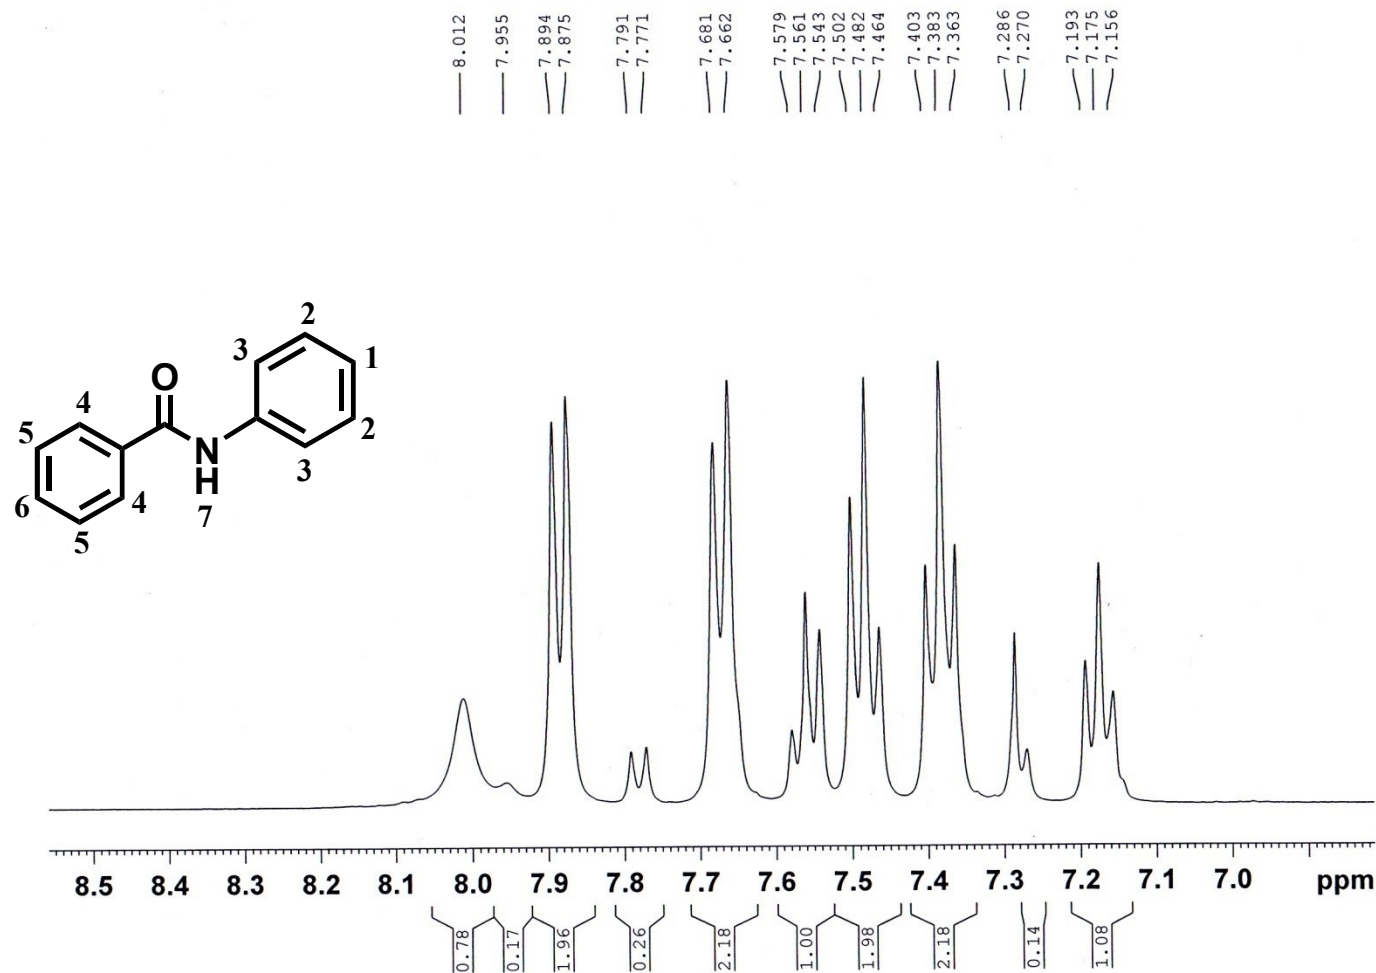

Current Data Parameters  
 NAME BUET\_MB  
 EXPNO 1  
 PROCNO 1

F2 - Acquisition Parameters  
 Date\_ 20200223  
 Time 11.36  
 INSTRUM spect  
 PROBHD 5 mm PABBO BB/  
 PULPROG zg  
 TD 65536  
 SOLVENT CDCl3  
 NS 16  
 DS 0  
 SWH 12019.230 Hz  
 FIDRES 0.183399 Hz  
 AQ 2.7262976 sec  
 RG 66.24  
 DW 41.600 usec  
 DE 6.50 usec  
 TE 298.0 K  
 D1 1.00000000 sec  
 TD0 1

===== CHANNEL f1 =====  
 SFO1 400.2340023 MHz  
 NUC1 1H  
 P1 11.20 usec  
 PLW1 12.00000000 W

F2 - Processing parameters  
 SI 131072  
 SF 400.2300000 MHz  
 WDW EM  
 SSB 0  
 LB 1.00 Hz  
 GB 0  
 PC 1.00

Figure S6: Extended <sup>1</sup>H-NMR spectrum of compound 1.

Wazed Miah Science Research Centre (WMSRC)  
 Jahangirnagar University  
 Sample: MB, 13C  
 Operated by: Md. Emdad Hossain, Scientist

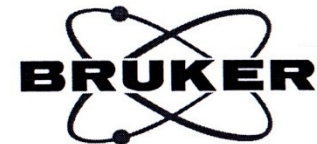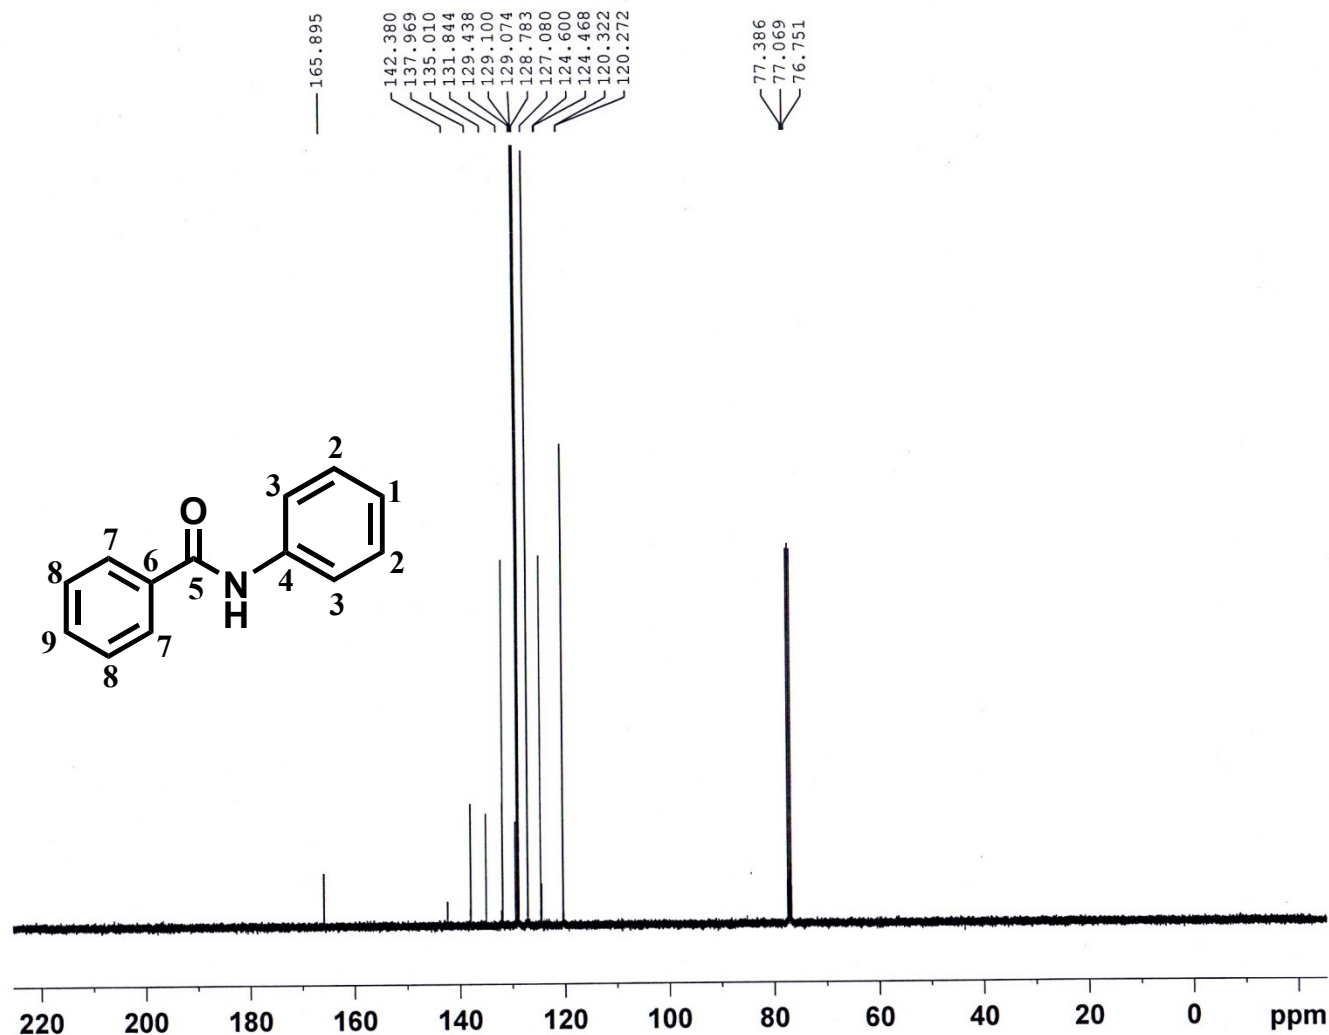

Current Data Parameters  
 NAME BUET\_MB  
 EXPNO 2  
 PROCNO 1

F2 - Acquisition Parameters  
 Date\_ 20200223  
 Time 11.39  
 INSTRUM spect  
 PROBHD 5 mm PABBO BB/  
 PULPROG zgpg  
 TD 524288  
 SOLVENT CDCl3  
 NS 128  
 DS 0  
 SWH 25252.525 Hz  
 FIDRES 0.048165 Hz  
 AQ 10.3809023 sec  
 RG 208.5  
 DW 19.800 usec  
 DE 6.50 usec  
 TE 298.0 K  
 D1 1.00000000 sec  
 D11 0.03000000 sec  
 TD0 1

===== CHANNEL f1 =====  
 SFO1 100.6479778 MHz  
 NUC1 13C  
 P1 10.00 usec  
 PLW1 49.00000000 W

===== CHANNEL f2 =====  
 SFO2 400.2320011 MHz  
 NUC2 1H  
 CPDPRG[2] waltz16  
 PCPD2 90.00 usec  
 PLW2 12.00000000 W  
 PLW12 0.18584000 W  
 PLW13 0.15053000 W

F2 - Processing parameters  
 SI 1048576  
 SF 100.6379135 MHz  
 WDW EM  
 SSB 0  
 LB 0.30 Hz  
 GB 0  
 PC 1.40

Figure S7: <sup>13</sup>C-NMR spectrum of compound 1.



Wazed Miah Science Research Centre (WMSRC)  
 Jahangirnagar University  
 Sample: MB, 13C  
 Operated by: Md. Emdad Hossain, Scientist

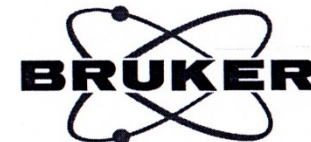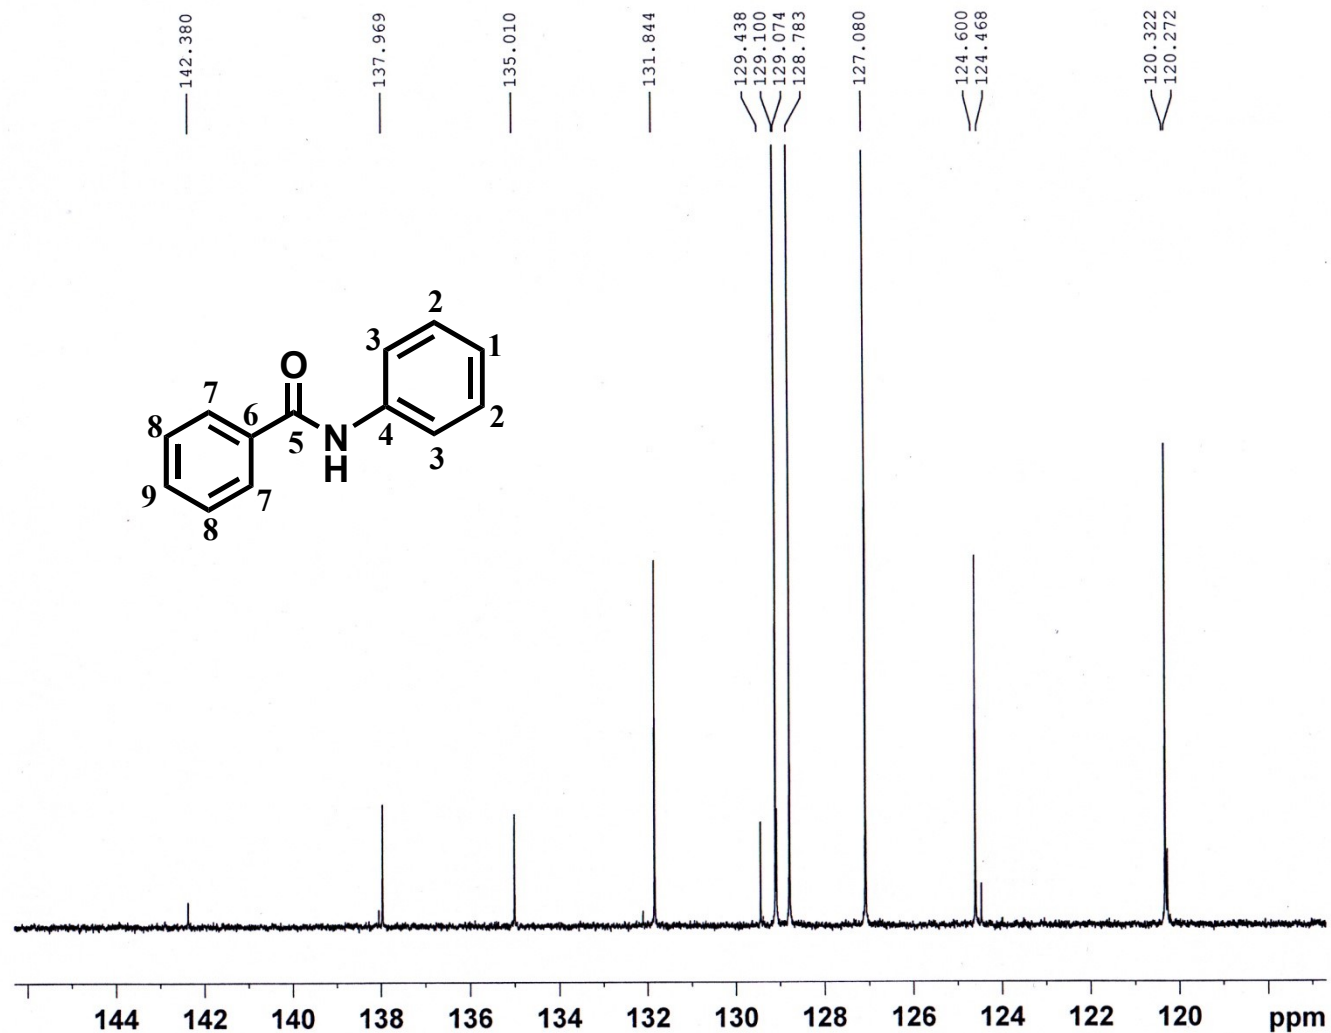

Current Data Parameters  
 NAME BUET\_MB  
 EXPNO 2  
 PROCNO 1

F2 - Acquisition Parameters  
 Date\_ 20200223  
 Time\_ 11.39  
 INSTRUM spect  
 PROBHD 5 mm PABBO BB/  
 PULPROG zgpgg  
 TD 524288  
 SOLVENT CDCl3  
 NS 128  
 DS 0  
 SWH 25252.525 Hz  
 FIDRES 0.048165 Hz  
 AQ 10.3809023 sec  
 RG 208.5  
 DW 19.800 usec  
 DE 6.50 usec  
 TE 298.0 K  
 D1 1.00000000 sec  
 D11 0.03000000 sec  
 TD0 1

===== CHANNEL f1 =====  
 SFO1 100.6479778 MHz  
 NUC1 13C  
 P1 10.00 usec  
 PLW1 49.00000000 W

===== CHANNEL f2 =====  
 SFO2 400.2320011 MHz  
 NUC2 1H  
 CPDPRG[2] waltz16  
 PCPD2 90.00 usec  
 PLW2 12.00000000 W  
 PLW12 0.18584000 W  
 PLW13 0.15053000 W

F2 - Processing parameters  
 SI 1048576  
 SF 100.6379135 MHz  
 WDW EM  
 SSB 0  
 LB 0.30 Hz  
 GB 0  
 PC 1.40

Figure S8: Extended <sup>13</sup>C-NMR spectrum of compound 1.

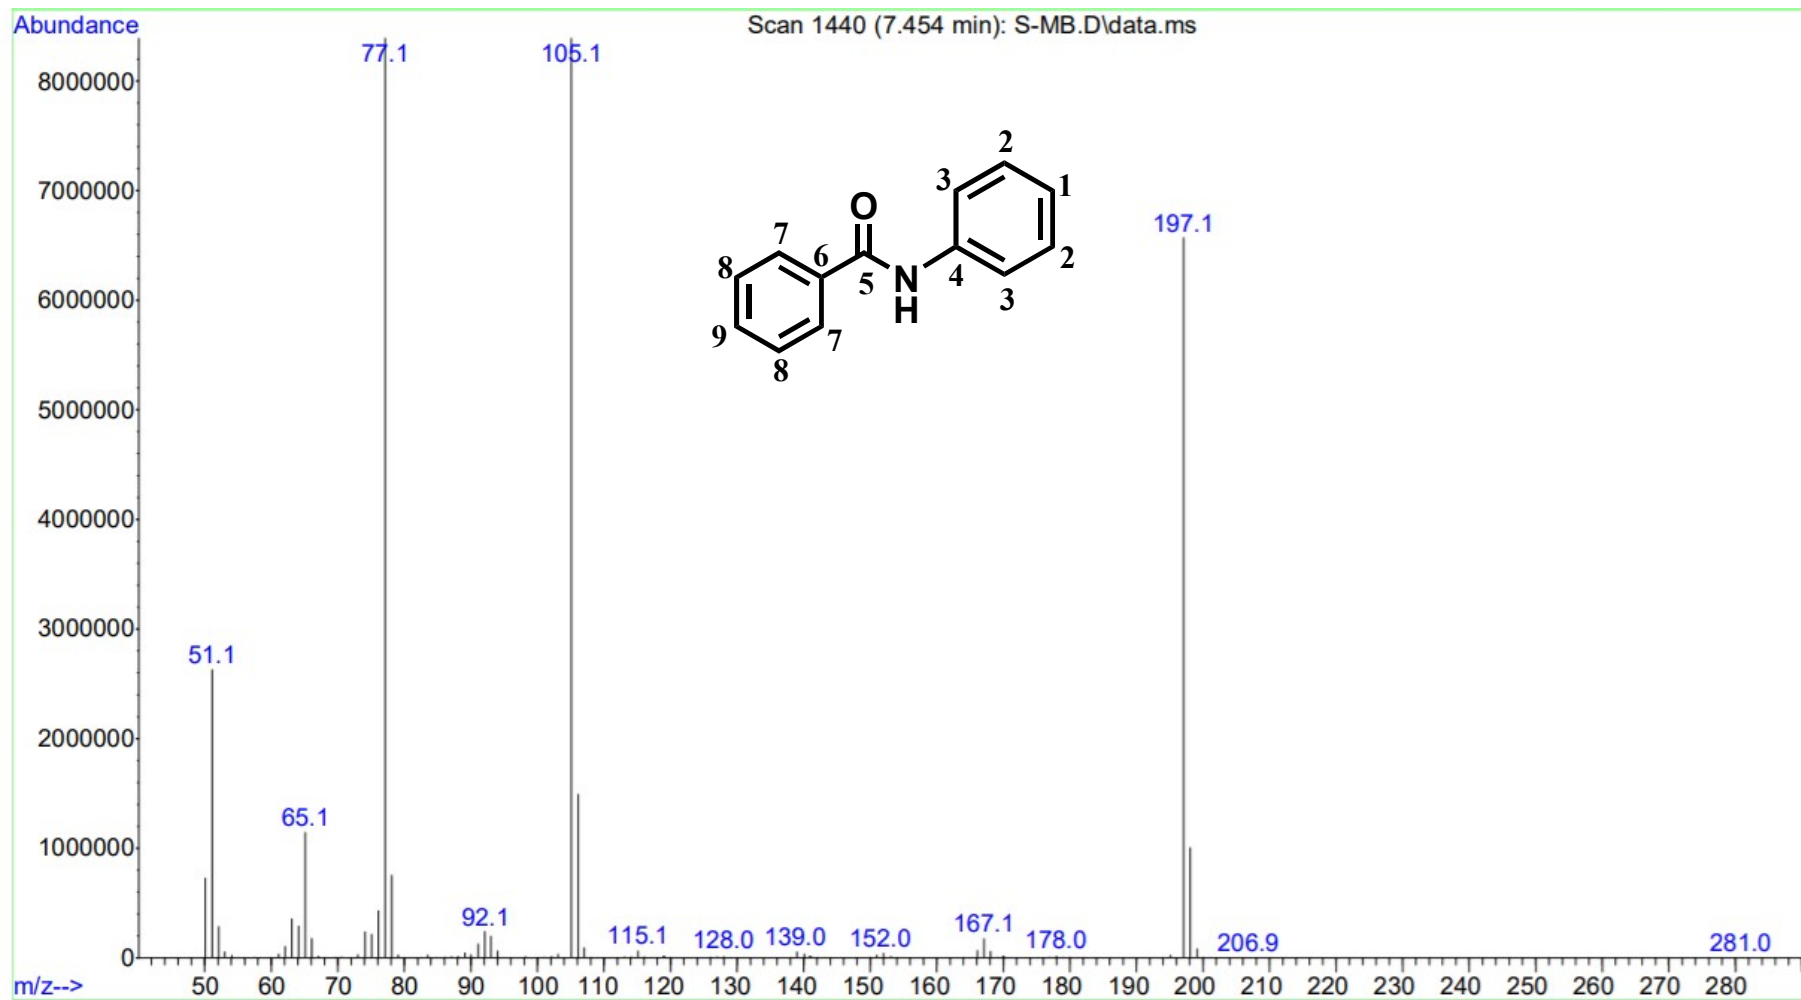

Figure S9: GC-MS spectrum of compound 1.

12. Spectra of compound 2

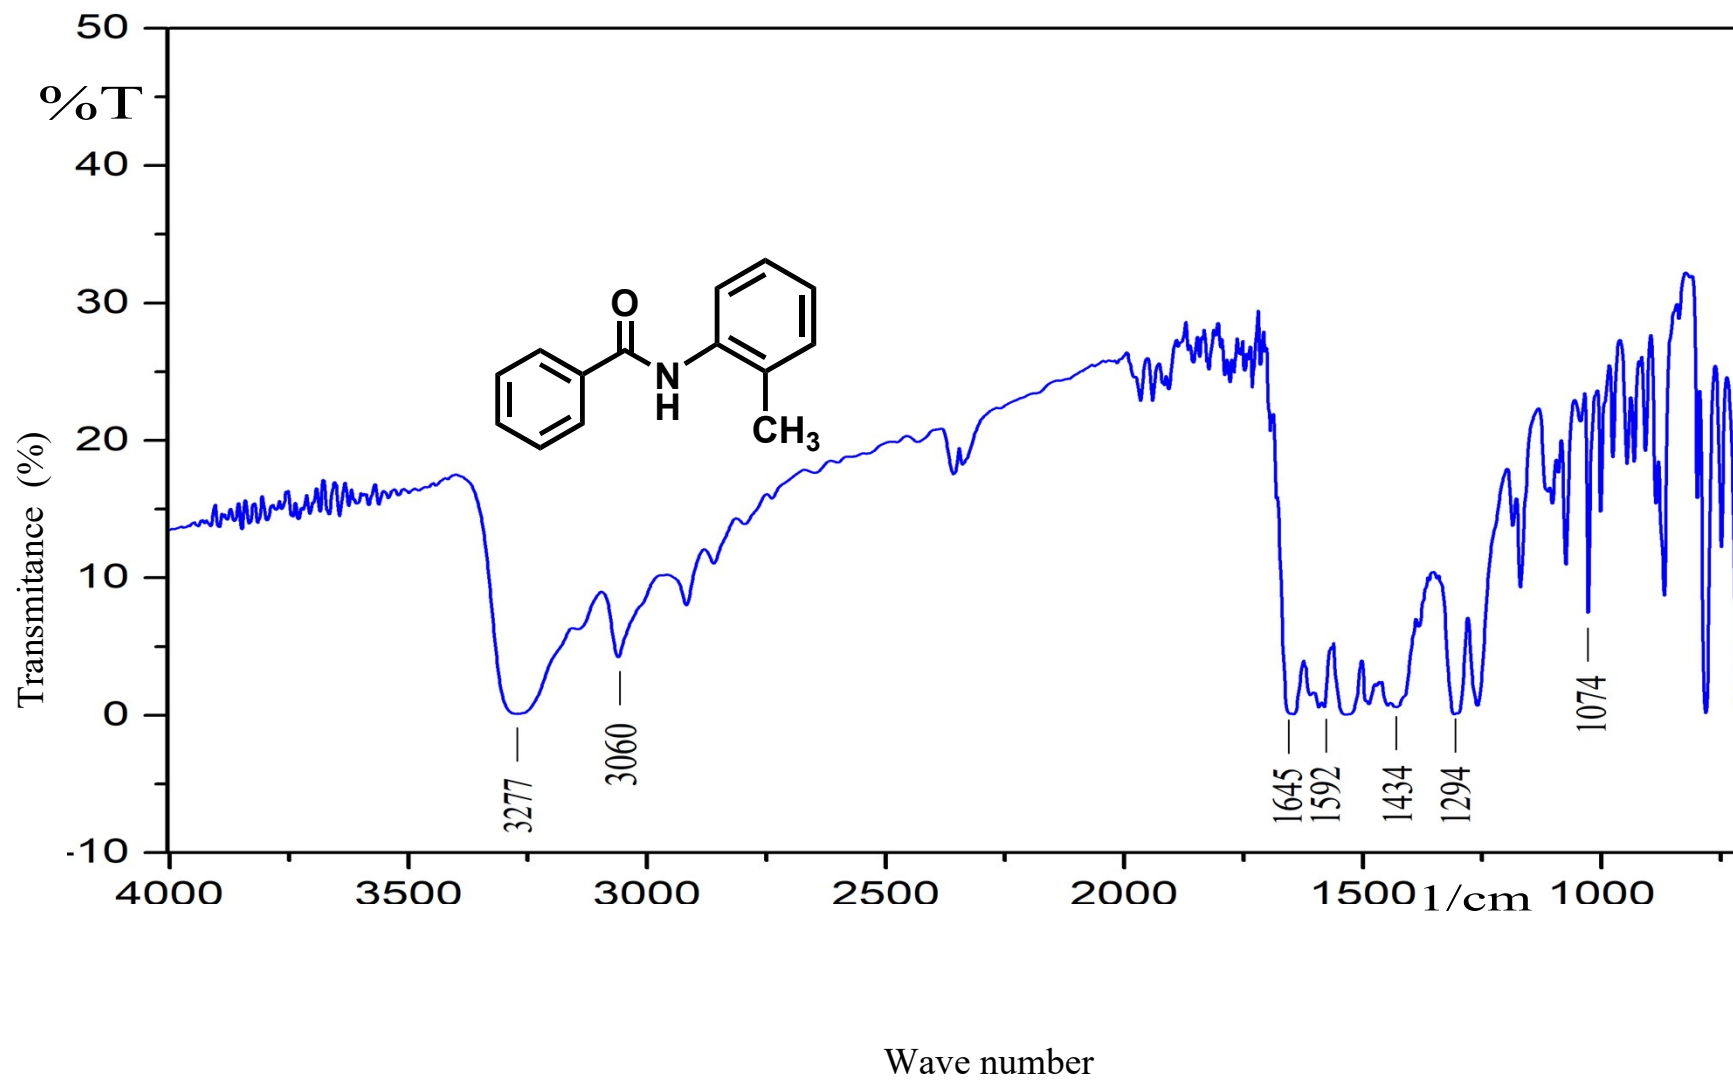

Figure S10: FT-IR spectrum of compound 2

Wazed Miah Science Research Centre (WMSRC)  
 Jahanginagar University  
 Sample: MD  
 Operated by: Md. Emdad Hossain, Scientist

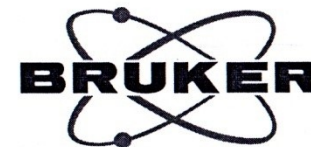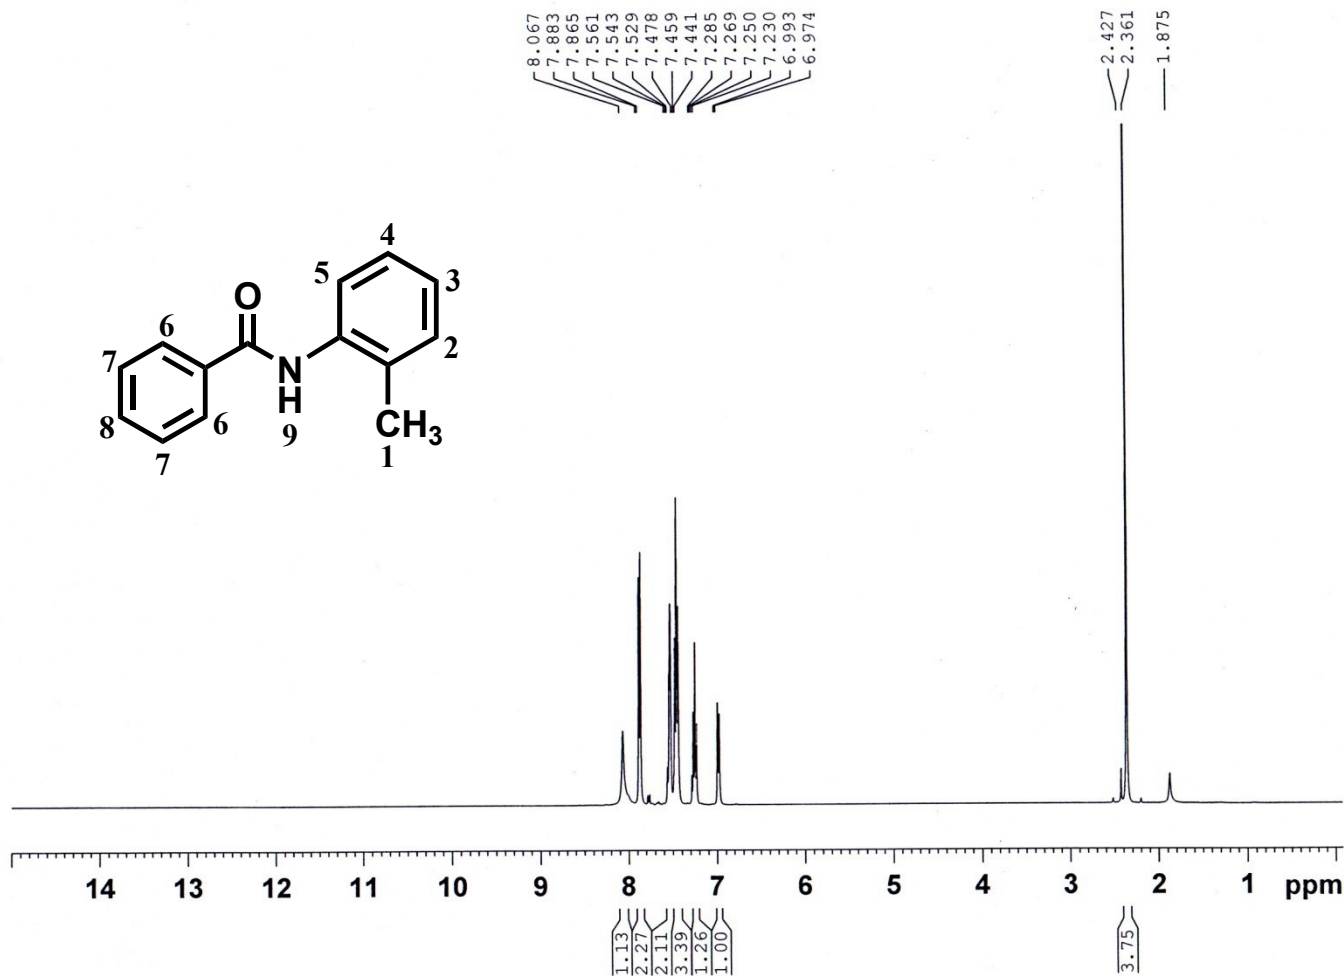

Current Data Parameters  
 NAME BUET\_MD  
 EXPNO 1  
 PROCNO 1

F2 - Acquisition Parameters  
 Date\_ 20200223  
 Time\_ 12.06  
 INSTRUM spect  
 PROBHD 5 mm PABBO BB/  
 PULPROG zg  
 TD 65536  
 SOLVENT CDCl3  
 NS 16  
 DS 0  
 SWH 12019.230 Hz  
 FIDRES 0.183399 Hz  
 AQ 2.7262976 sec  
 RG 58.24  
 DW 41.600 usec  
 DE 6.50 usec  
 TE 298.0 K  
 D1 1.00000000 sec  
 TD0 1

===== CHANNEL f1 =====  
 SFO1 400.2340023 MHz  
 NUC1 1H  
 P1 11.20 usec  
 PLW1 12.00000000 W

F2 - Processing parameters  
 SI 131072  
 SF 400.2300000 MHz  
 WDW EM  
 SSB 0  
 LB 1.00 Hz  
 GB 0  
 PC 1.00

Figure S11: <sup>1</sup>H-NMR spectrum of compound 2

Wazed Miah Science Research Centre (WMSRC)  
Jahanginagar University

Sample: MD

Operated by: Md. Emdad Hossain, Scientist

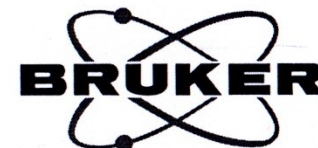

Current Data Parameters  
NAME BUET\_MD  
EXPNO 1  
PROCNO 1

F2 - Acquisition Parameters  
Date\_ 20200223  
Time\_ 12.06  
INSTRUM spect  
PROBHD 5 mm PABBO BB/  
PULPROG zg  
TD 65536  
SOLVENT CDCl3  
NS 16  
DS 0  
SWH 12019.230 Hz  
FIDRES 0.183399 Hz  
AQ 2.7262976 sec  
RG 58.24  
DW 41.600 usec  
DE 6.50 usec  
TE 298.0 K  
D1 1.00000000 sec  
TD0 1

===== CHANNEL f1 =====  
SF01 400.2340023 MHz  
NUC1 1H  
P1 11.20 usec  
PLW1 12.00000000 W

F2 - Processing parameters  
SI 131072  
SF 400.2300000 MHz  
WDW EM  
SSB 0  
LB 1.00 Hz  
GB 0  
PC 1.00

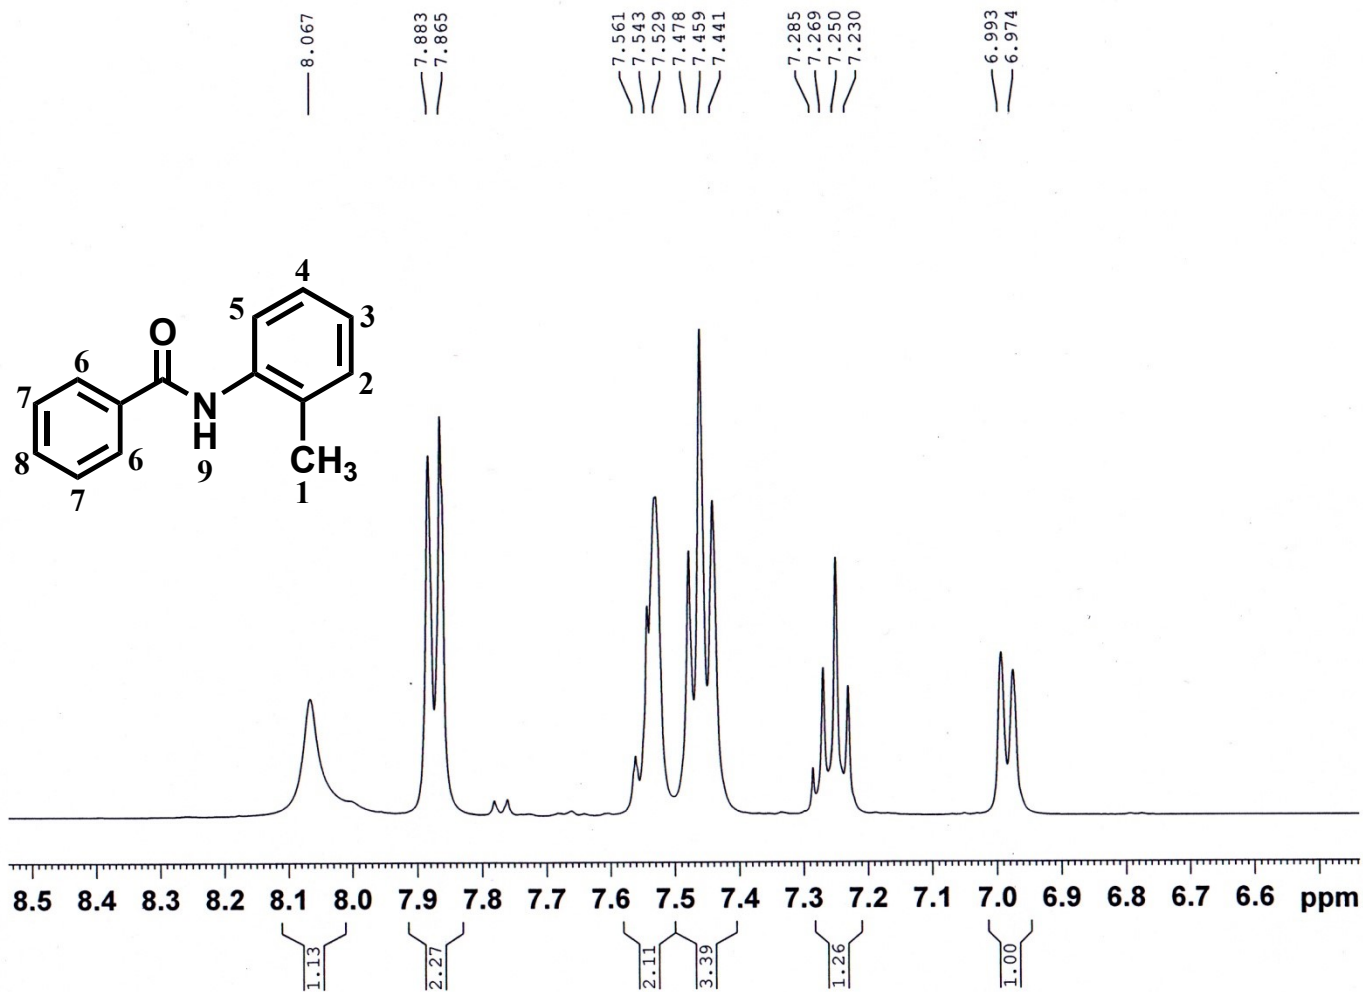

Figure S12: Extended <sup>1</sup>H-NMR spectrum of compound 2

Wazed Miah Science Research Centre (WMSRC)  
 Jahangirnagar University  
 Sample: MD, 13C  
 Operated by: Md. Emdad Hossain, Scientist

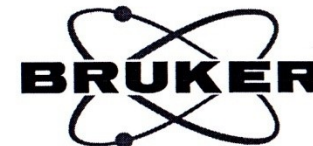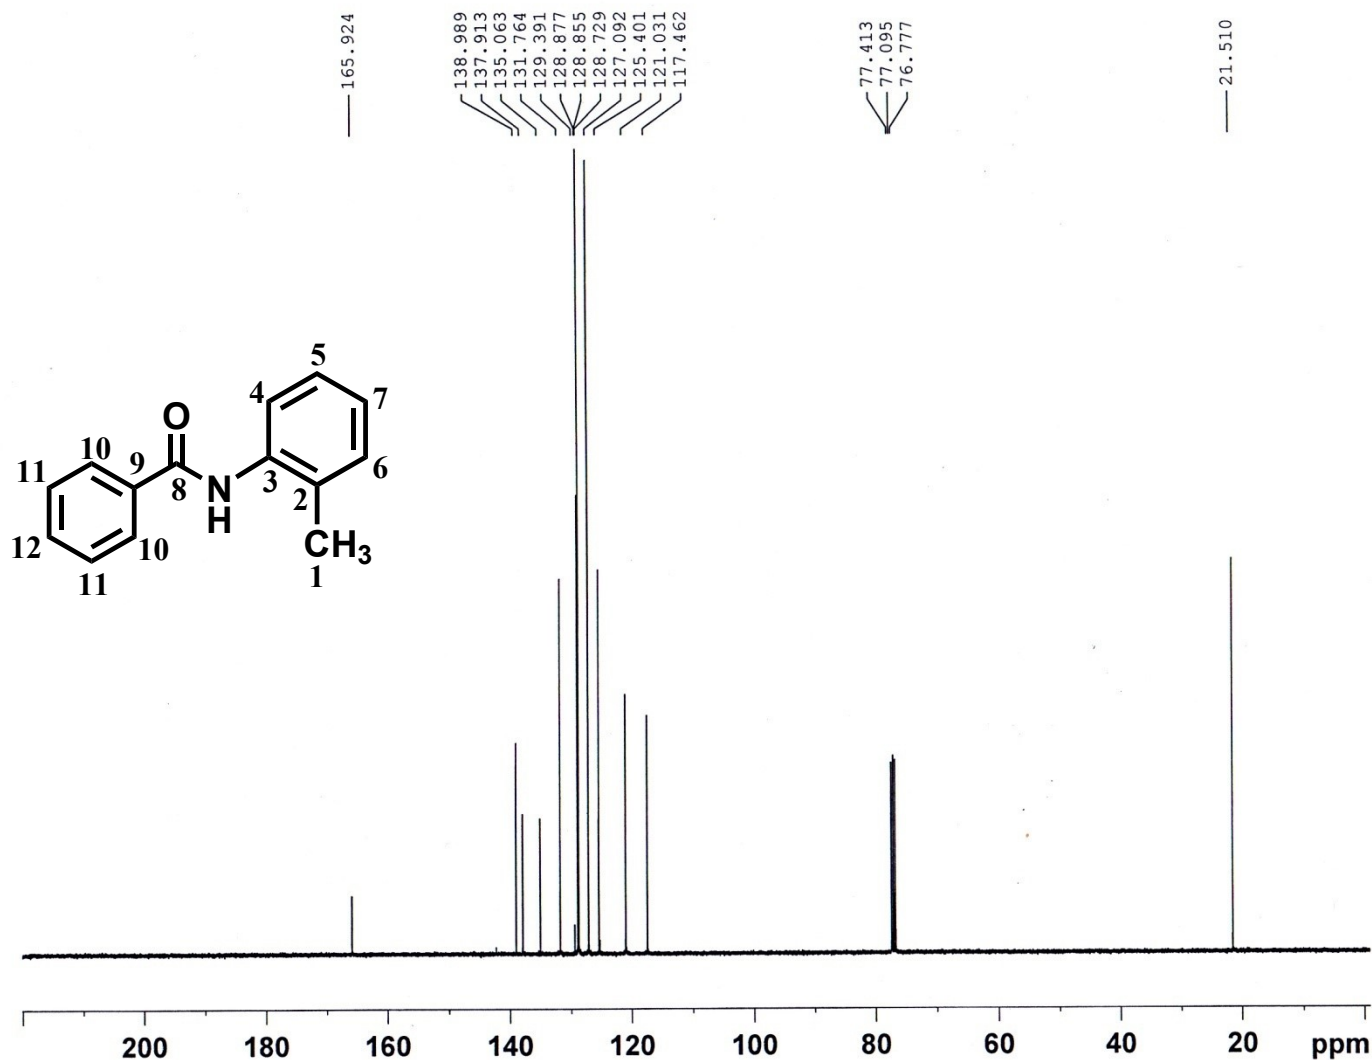

Current Data Parameters  
 NAME BUET\_MD  
 EXPNO 2  
 PROCNO 1

F2 - Acquisition Parameters  
 Date\_ 20200223  
 Time\_ 12.50  
 INSTRUM spect  
 PROBHD 5 mm PABBO BB/  
 PULPROG zgpg  
 TD 524288  
 SOLVENT CDC13  
 NS 229  
 DS 0  
 SWH 25252.525 Hz  
 FIDRES 0.048165 Hz  
 AQ 10.3809023 sec  
 RG 208.5  
 DW 19.800 usec  
 DE 6.50 usec  
 TE 298.0 K  
 D1 1.00000000 sec  
 D11 0.03000000 sec  
 TD0 1

==== CHANNEL f1 =====  
 SFO1 100.6479778 MHz  
 NUC1 13C  
 P1 10.00 usec  
 PLW1 49.00000000 W

==== CHANNEL f2 =====  
 SFO2 400.2320011 MHz  
 NUC2 1H  
 CPDPRG[2] waltz16  
 PCPD2 90.00 usec  
 PLW2 12.00000000 W  
 PLW12 0.18584000 W  
 PLW13 0.15053000 W

F2 - Processing parameters  
 SI 1048576  
 SF 100.6379135 MHz  
 WDW EM  
 SSB 0  
 LB 0.30 Hz  
 GB 0  
 PC 1.40

Figure S13: <sup>13</sup>C-NMR spectrum of compound 2.

Wazed Miah Science Research Centre (WMSRC)  
 Jahangirnagar University  
 Sample: MD, 13C  
 Operated by: Md. Emdad Hossain, Scientist

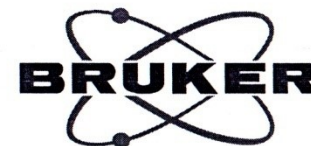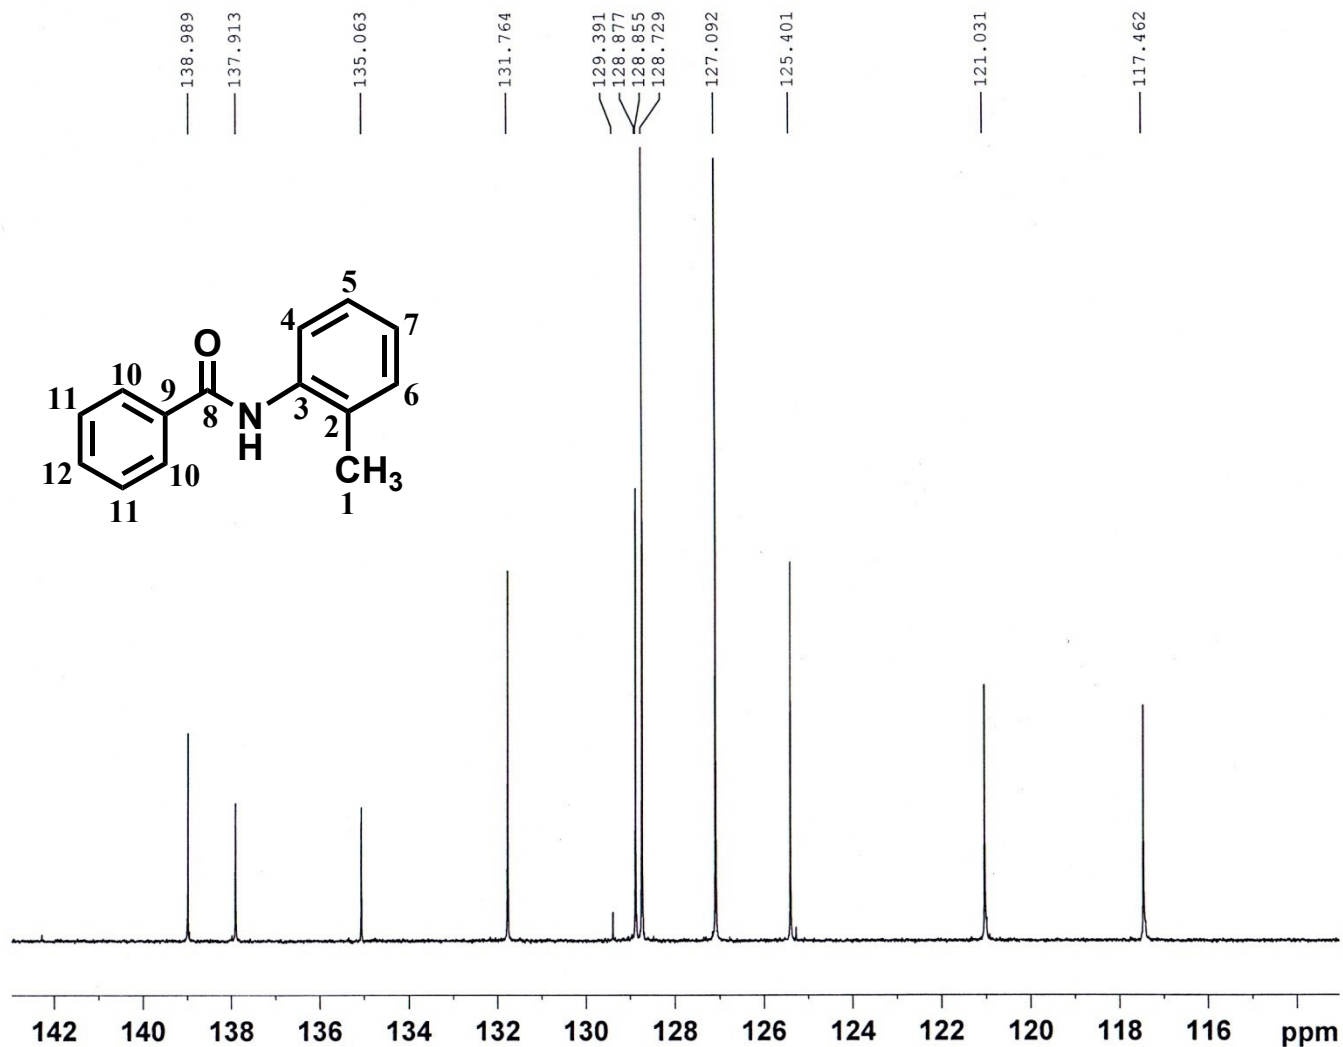

Current Data Parameters  
 NAME BUET\_MD  
 EXPNO 2  
 PROCNO 1

F2 - Acquisition Parameters  
 Date\_ 20200223  
 Time\_ 12.50  
 INSTRUM spect  
 PROBHD 5 mm PABBO BB/  
 PULPROG zgpg  
 TD 524288  
 SOLVENT CDCl3  
 NS 229  
 DS 0  
 SWH 25252.525 Hz  
 FIDRES 0.048165 Hz  
 AQ 10.3809023 sec  
 RG 208.5  
 DW 19.800 usec  
 DE 6.50 usec  
 TE 298.0 K  
 D1 1.00000000 sec  
 D11 0.03000000 sec  
 TD0 1

===== CHANNEL f1 =====  
 SFO1 100.6479778 MHz  
 NUC1 13C  
 P1 10.00 usec  
 PLW1 49.00000000 W

===== CHANNEL f2 =====  
 SFO2 400.2320011 MHz  
 NUC2 1H  
 CPDPRG[2] waltz16  
 PCPD2 90.00 usec  
 PLW2 12.00000000 W  
 PLW12 0.18584000 W  
 PLW13 0.15053000 W

F2 - Processing parameters  
 SI 1048576  
 SF 100.6379135 MHz  
 WDW EM  
 SSB 0  
 LB 0.30 Hz  
 GB 0  
 PC 1.40

Figure S14: Extended <sup>13</sup>C-NMR spectrum of compound 2.

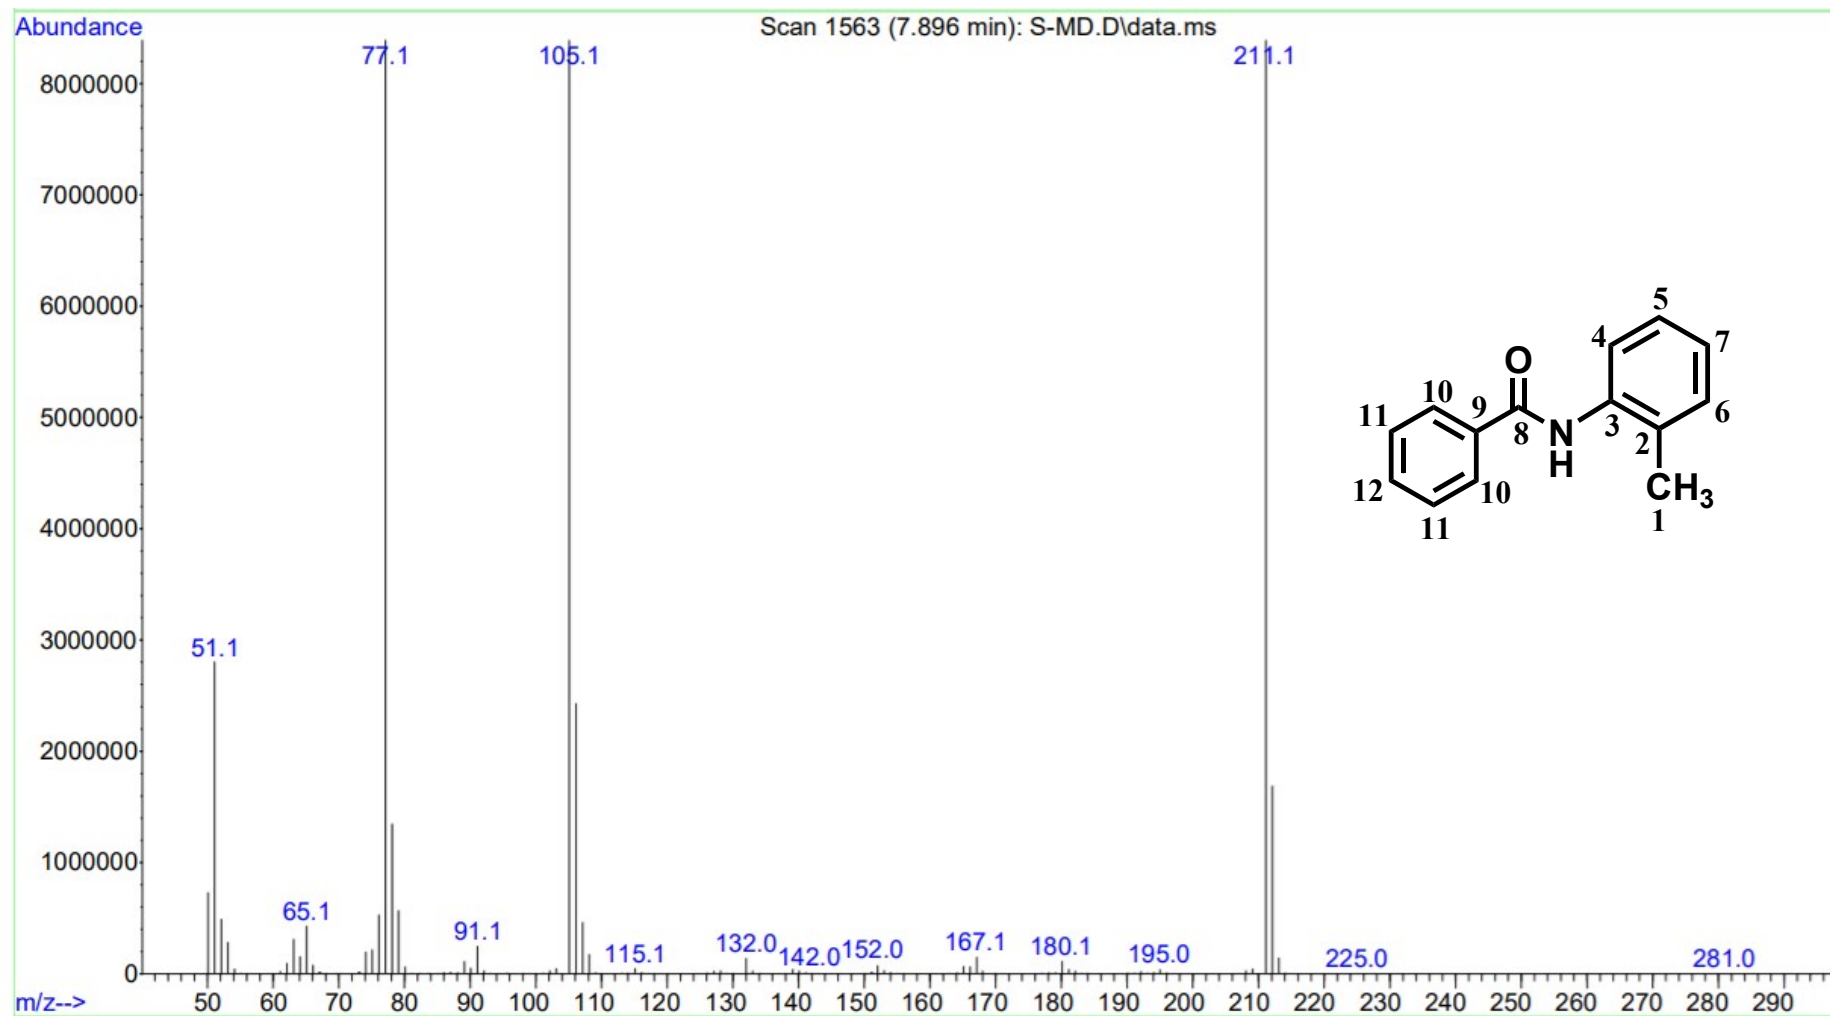

Figure S15: GC-MS spectrum of compound 2.



### 13. Spectra of compound 3

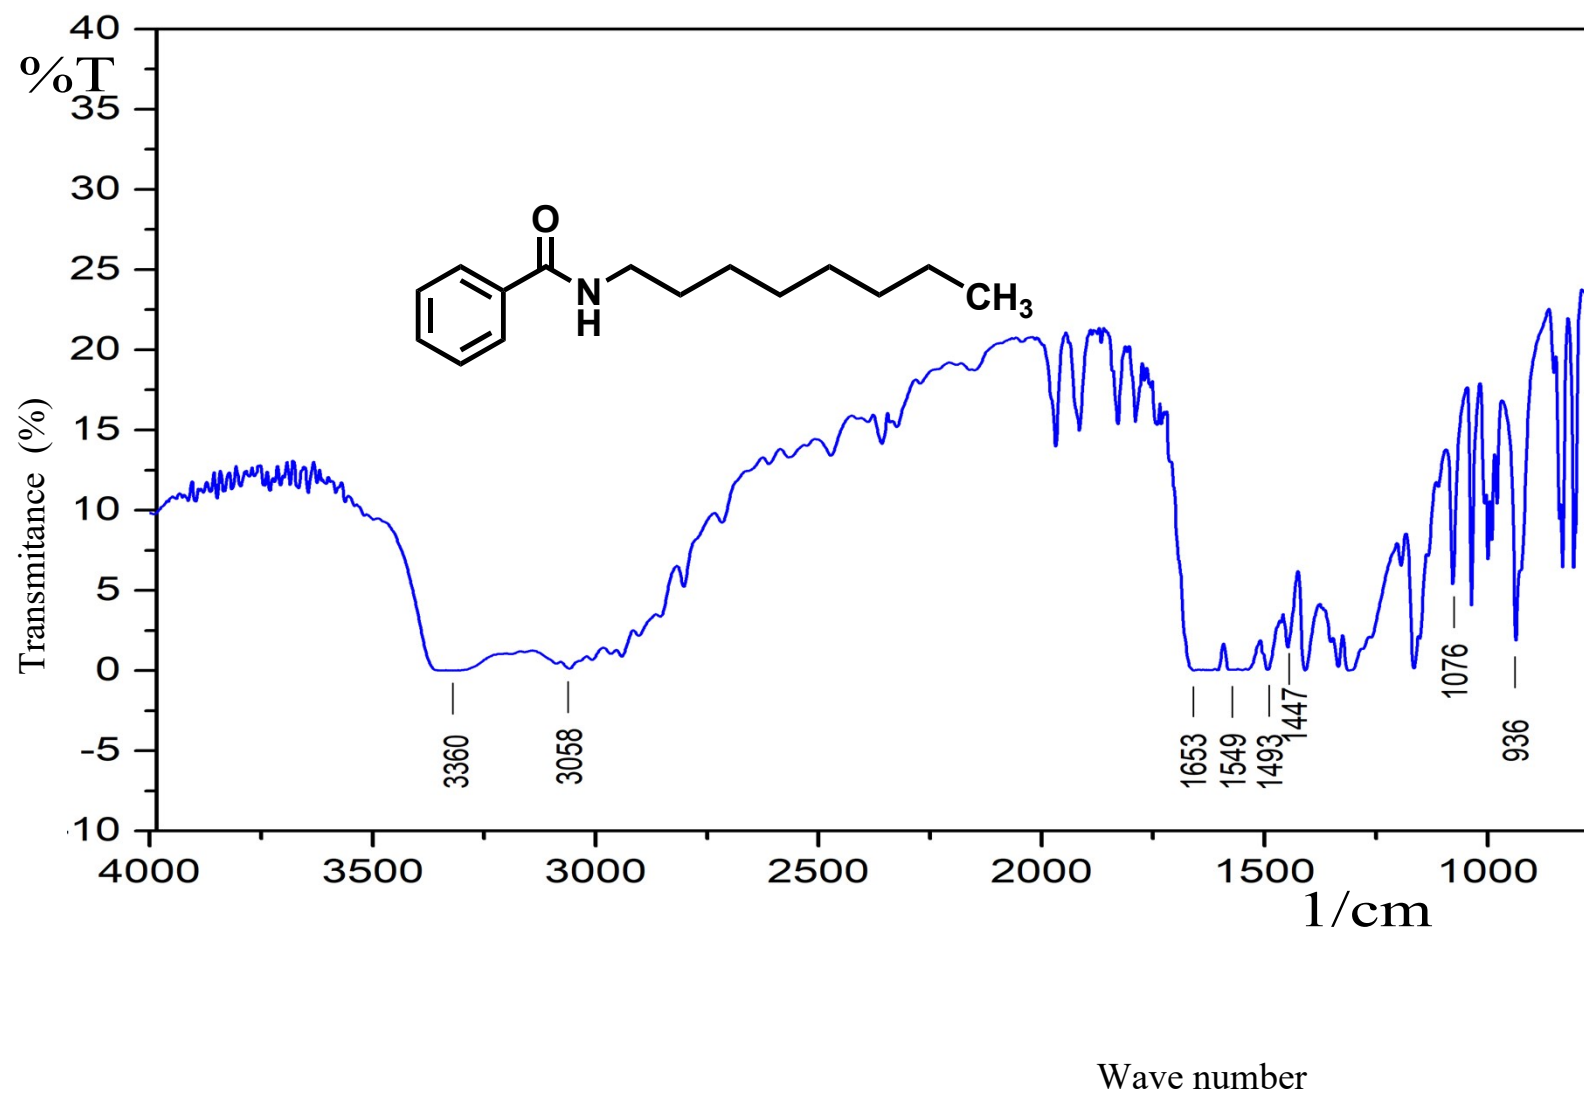

Figure S16: FT-IR spectrum of compound 3.

Wazed Miah Science Research Centre (WMSRC)  
 Jahanginagar University  
 Sample: MC  
 Operated by: Md. Emdad Hossain, Scientist

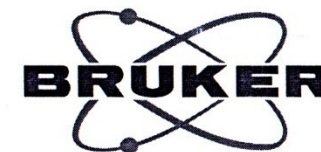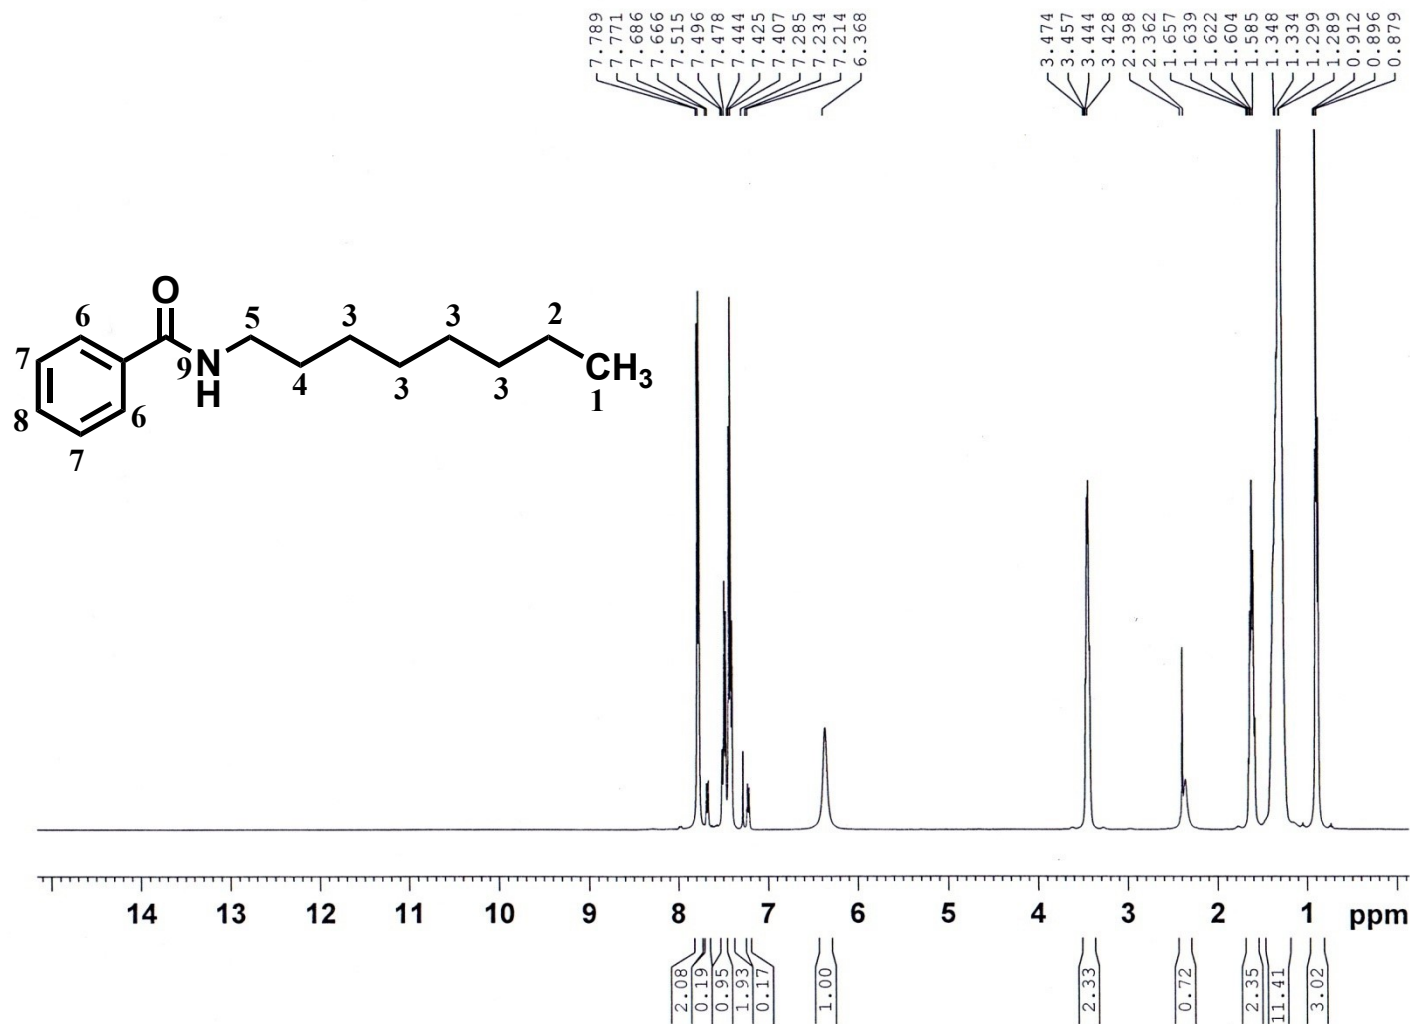

Current Data Parameters  
 NAME BUET\_MC  
 EXPNO 1  
 PROCNO 1

F2 - Acquisition Parameters  
 Date\_ 20200223  
 Time\_ 12.55  
 INSTRUM spect  
 PROBHD 5 mm PABBO BB/  
 PULPROG zg  
 TD 65536  
 SOLVENT CDCl3  
 NS 16  
 DS 0  
 SWH 12019.230 Hz  
 FIDRES 0.183399 Hz  
 AQ 2.7262976 sec  
 RG 36.81  
 DW 41.600 usec  
 DE 6.50 usec  
 TE 298.0 K  
 D1 1.00000000 sec  
 TD0 1

==== CHANNEL f1 =====  
 SFO1 400.2340023 MHz  
 NUC1 1H  
 P1 11.20 usec  
 PLW1 12.00000000 W

F2 - Processing parameters  
 SI 131072  
 SF 400.230000 MHz  
 WDW EM  
 SSB 0  
 LB 1.00 Hz  
 GB 0  
 PC 1.00

Figure S17: <sup>1</sup>H-NMR spectrum of compound 3

Wazed Miah Science Research Centre (WMSRC)  
 Jahanginagar University  
 Sample: MC  
 Operated by: Md. Emdad Hossain, Scientist

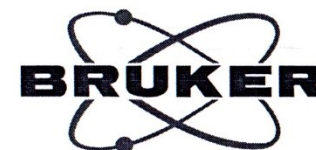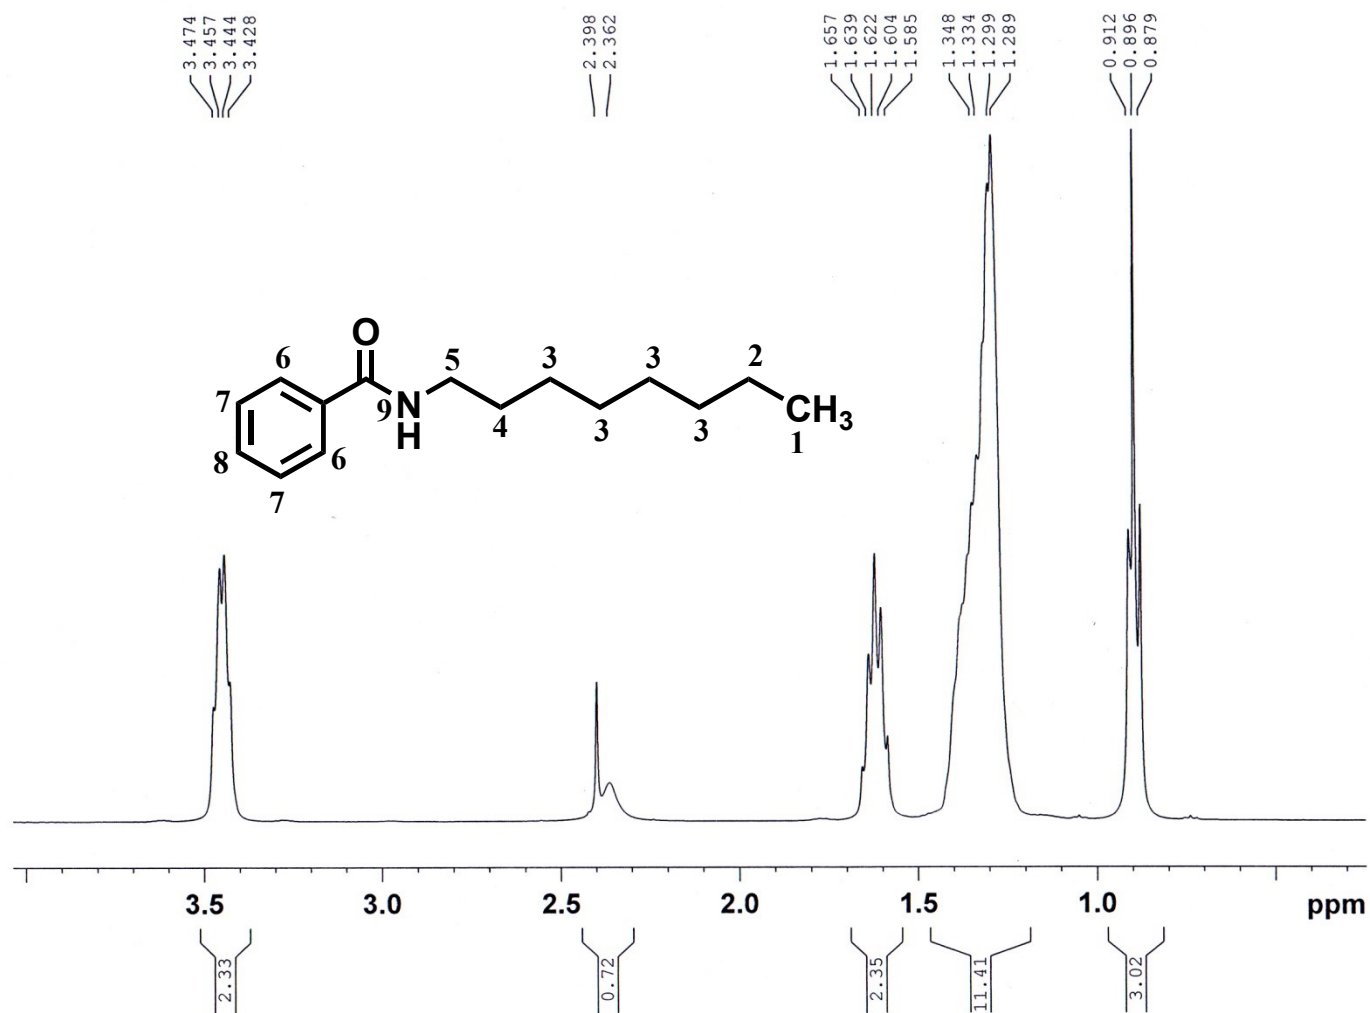

Current Data Parameters  
 NAME BUET\_MC  
 EXPNO 1  
 PROCNO 1

F2 - Acquisition Parameters  
 Date\_ 20200223  
 Time 12.55  
 INSTRUM spect  
 PROBHD 5 mm PABBO BB/  
 PULPROG zg  
 TD 65536  
 SOLVENT CDCl3  
 NS 16  
 DS 0  
 SWH 12019.230 Hz  
 FIDRES 0.183399 Hz  
 AQ 2.7262976 sec  
 RG 36.81  
 DW 41.600 usec  
 DE 6.50 usec  
 TE 298.0 K  
 D1 1.00000000 sec  
 TDO 1

==== CHANNEL f1 =====  
 SFO1 400.2340023 MHz  
 NUC1 1H  
 P1 11.20 usec  
 PLW1 12.00000000 W

F2 - Processing parameters  
 SI 131072  
 SF 400.2300000 MHz  
 WDW EM  
 SSB 0  
 LB 1.00 Hz  
 GB 0  
 PC 1.00

Figure S18: Extended <sup>1</sup>H-NMR spectrum of compound 3

Wazed Miah Science Research Centre (WMSRC)  
 Jahanginagar University  
 Sample: MC  
 Operated by: Md. Emdad Hossain, Scientist

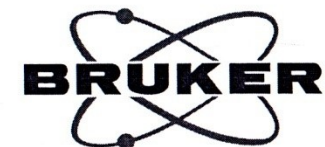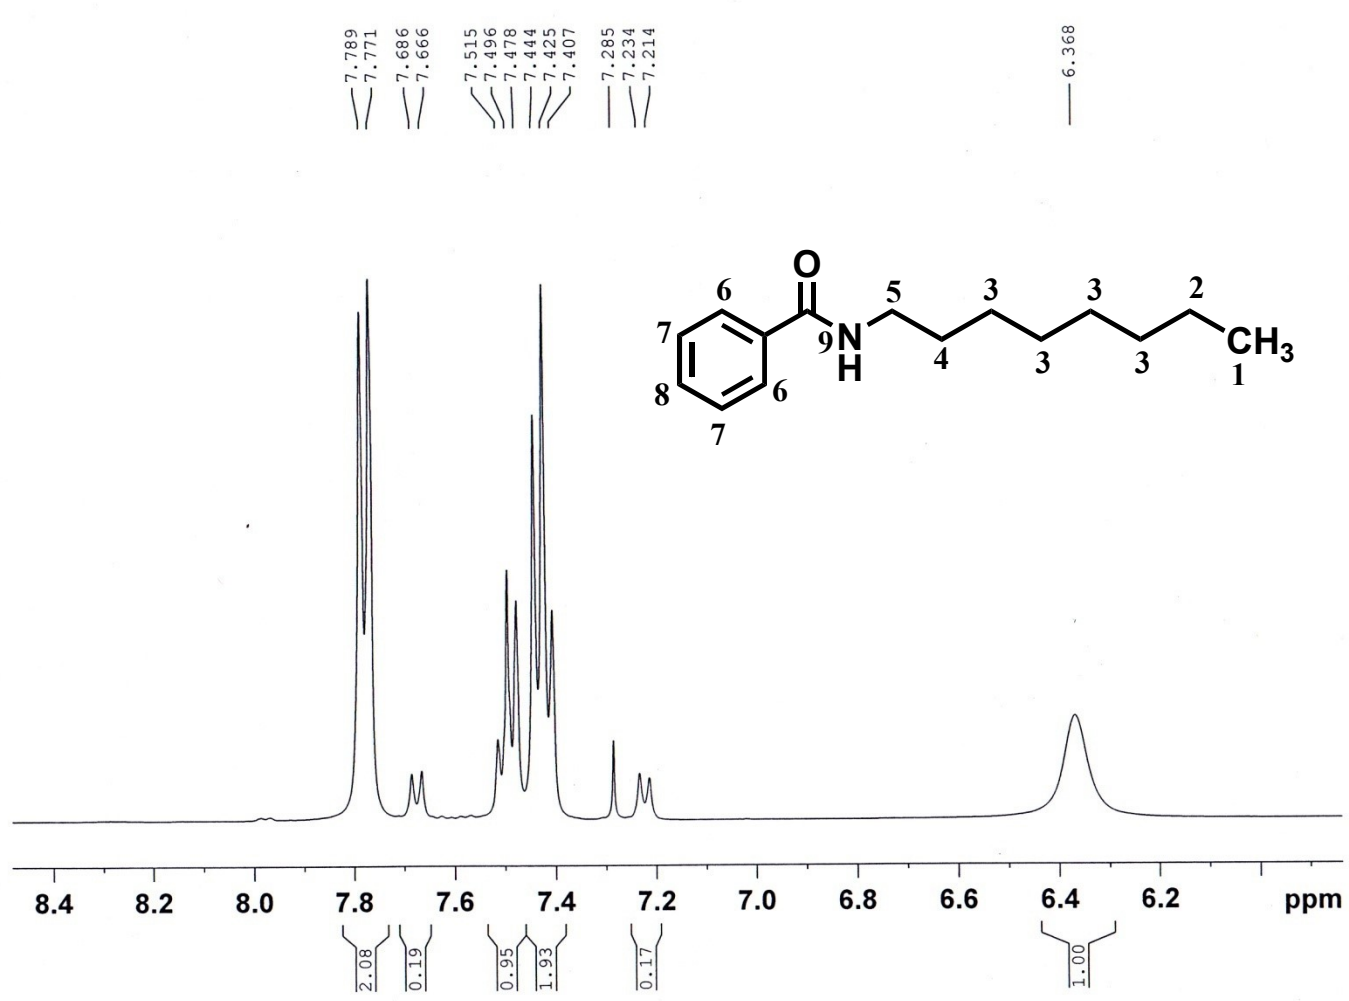

Current Data Parameters  
 NAME BUET\_MC  
 EXPNO 1  
 PROCNO 1

F2 - Acquisition Parameters  
 Date\_ 20200223  
 Time\_ 12.55  
 INSTRUM spect  
 PROBHD 5 mm PABBO BB/  
 PULPROG zg  
 TD 65536  
 SOLVENT CDCl3  
 NS 16  
 DS 0  
 SWH 12019.230 Hz  
 FIDRES 0.183399 Hz  
 AQ 2.7262976 sec  
 RG 36.81  
 DW 41.600 usec  
 DE 6.50 usec  
 TE 298.0 K  
 D1 1.00000000 sec  
 TD0 1

===== CHANNEL f1 =====  
 SFO1 400.2340023 MHz  
 NUC1 1H  
 P1 11.20 usec  
 PLW1 12.00000000 W

F2 - Processing parameters  
 SI 131072  
 SF 400.2300000 MHz  
 WDW EM  
 SSB 0  
 LB 1.00 Hz  
 GB 0  
 PC 1.00

Figure S19: Extended <sup>1</sup>H-NMR spectrum of compound 3.

Wazed Miah Science Research Centre (WMSRC)  
 Jahangirnagar University  
 Sample: MC, <sup>13</sup>C  
 Operated by: Md. Emdad Hossain, Scientist

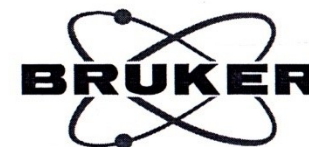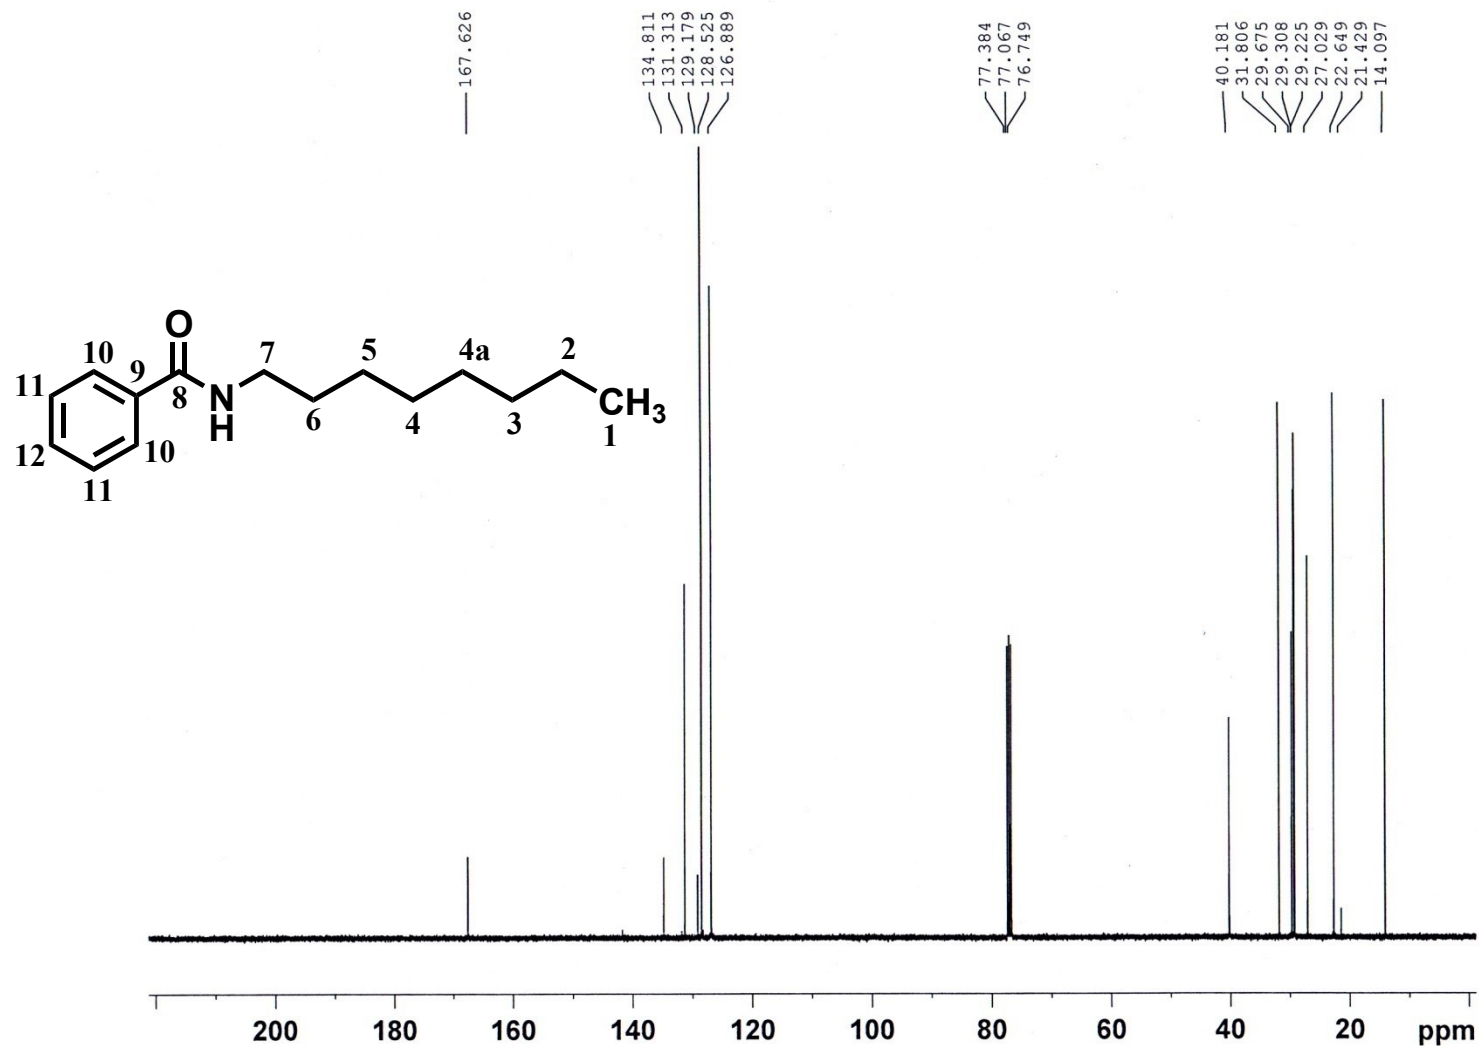

Current Data Parameters  
 NAME BUET\_MC  
 EXPNO 2  
 PROCNO 1

F2 - Acquisition Parameters  
 Date\_ 20200223  
 Time 13.29  
 INSTRUM spect  
 PROBHD 5 mm PABBO BB/  
 PULPROG zgpg  
 TD 524288  
 SOLVENT CDCl3  
 NS 169  
 DS 0  
 SWH 25252.525 Hz  
 FIDRES 0.048165 Hz  
 AQ 10.3809023 sec  
 RG 208.5  
 DW 19.800 usec  
 DE 6.50 usec  
 TE 298.0 K  
 D1 1.00000000 sec  
 D11 0.03000000 sec  
 TD0 1

===== CHANNEL f1 =====  
 SFO1 100.6479778 MHz  
 NUC1 13C  
 P1 10.00 usec  
 PLW1 49.00000000 W

===== CHANNEL f2 =====  
 SFO2 400.2320011 MHz  
 NUC2 1H  
 CPDPRG[2] waltz16  
 PCPD2 90.00 usec  
 PLW2 12.00000000 W  
 PLW12 0.18584000 W  
 PLW13 0.15053000 W

F2 - Processing parameters  
 SI 1048576  
 SF 100.6379135 MHz  
 WDW EM  
 SSB 0  
 LB 0.30 Hz  
 GB 0  
 PC 1.40

Figure S20: <sup>13</sup>C-NMR spectrum of compound 3

Wazed Miah Science Research Centre (WMSRC)  
 Jahangirnagar University  
 Sample: MC, 13C  
 Operated by: Md. Emdad Hossain, Scientist

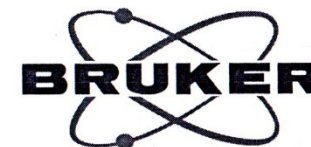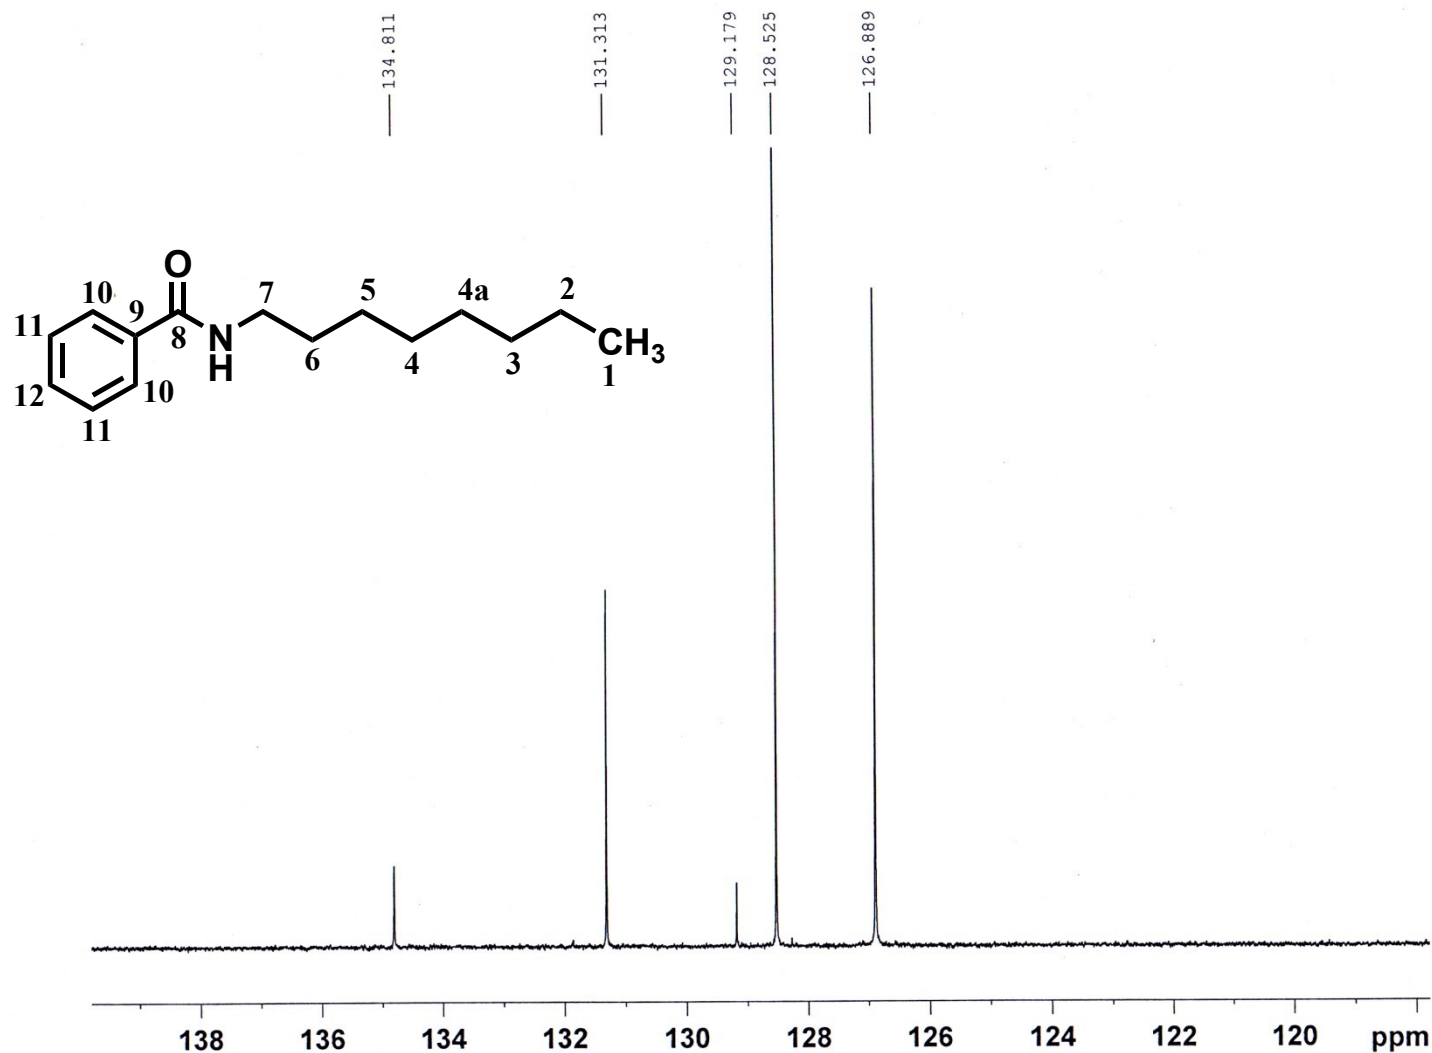

Current Data Parameters  
 NAME BUET\_MC  
 EXPNO 2  
 PROCNO 1

F2 - Acquisition Parameters  
 Date\_ 20200223  
 Time 13.29  
 INSTRUM spect  
 PROBHD 5 mm PABBO BB/  
 PULPROG zgpg  
 TD 524288  
 SOLVENT CDCl3  
 NS 169  
 DS 0  
 SWH 25252.525 Hz  
 FIDRES 0.048165 Hz  
 AQ 10.3809023 sec  
 RG 208.5  
 DW 19.800 usec  
 DE 6.50 usec  
 TE 298.0 K  
 D1 1.00000000 sec  
 D11 0.03000000 sec  
 TD0 1

===== CHANNEL f1 =====  
 SFO1 100.6479778 MHz  
 NUC1 13C  
 P1 10.00 usec  
 PLW1 49.00000000 W

===== CHANNEL f2 =====  
 SFO2 400.2320011 MHz  
 NUC2 1H  
 CPDPRG[2] waltz16  
 PCPD2 90.00 usec  
 PLW2 12.00000000 W  
 PLW12 0.18584000 W  
 PLW13 0.15053000 W

F2 - Processing parameters  
 SI 1048576  
 SF 100.6379135 MHz  
 WDW EM  
 SSB 0  
 LB 0.30 Hz  
 GB 0  
 PC 1.40

Figure S21: Extended <sup>13</sup>C-NMR spectrum of compound 3

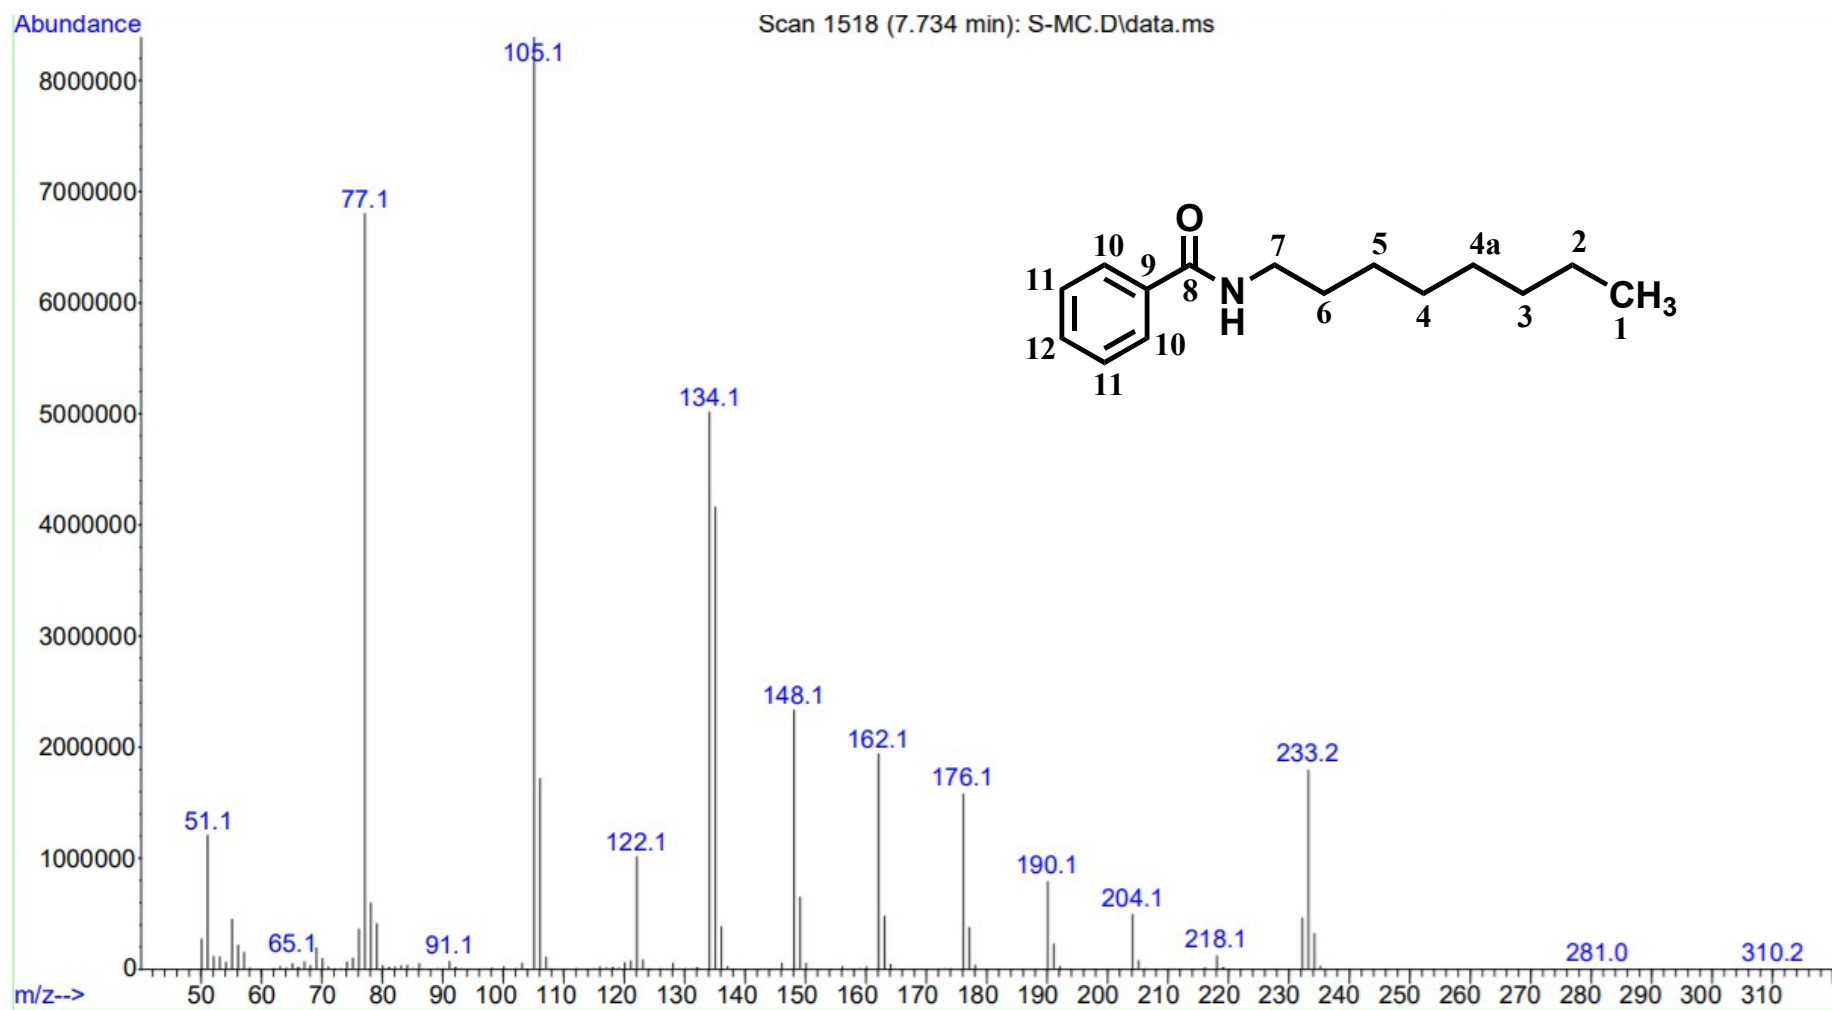

Figure S22: GC-MS spectrum of compound 3

14. Spectra of compound 4

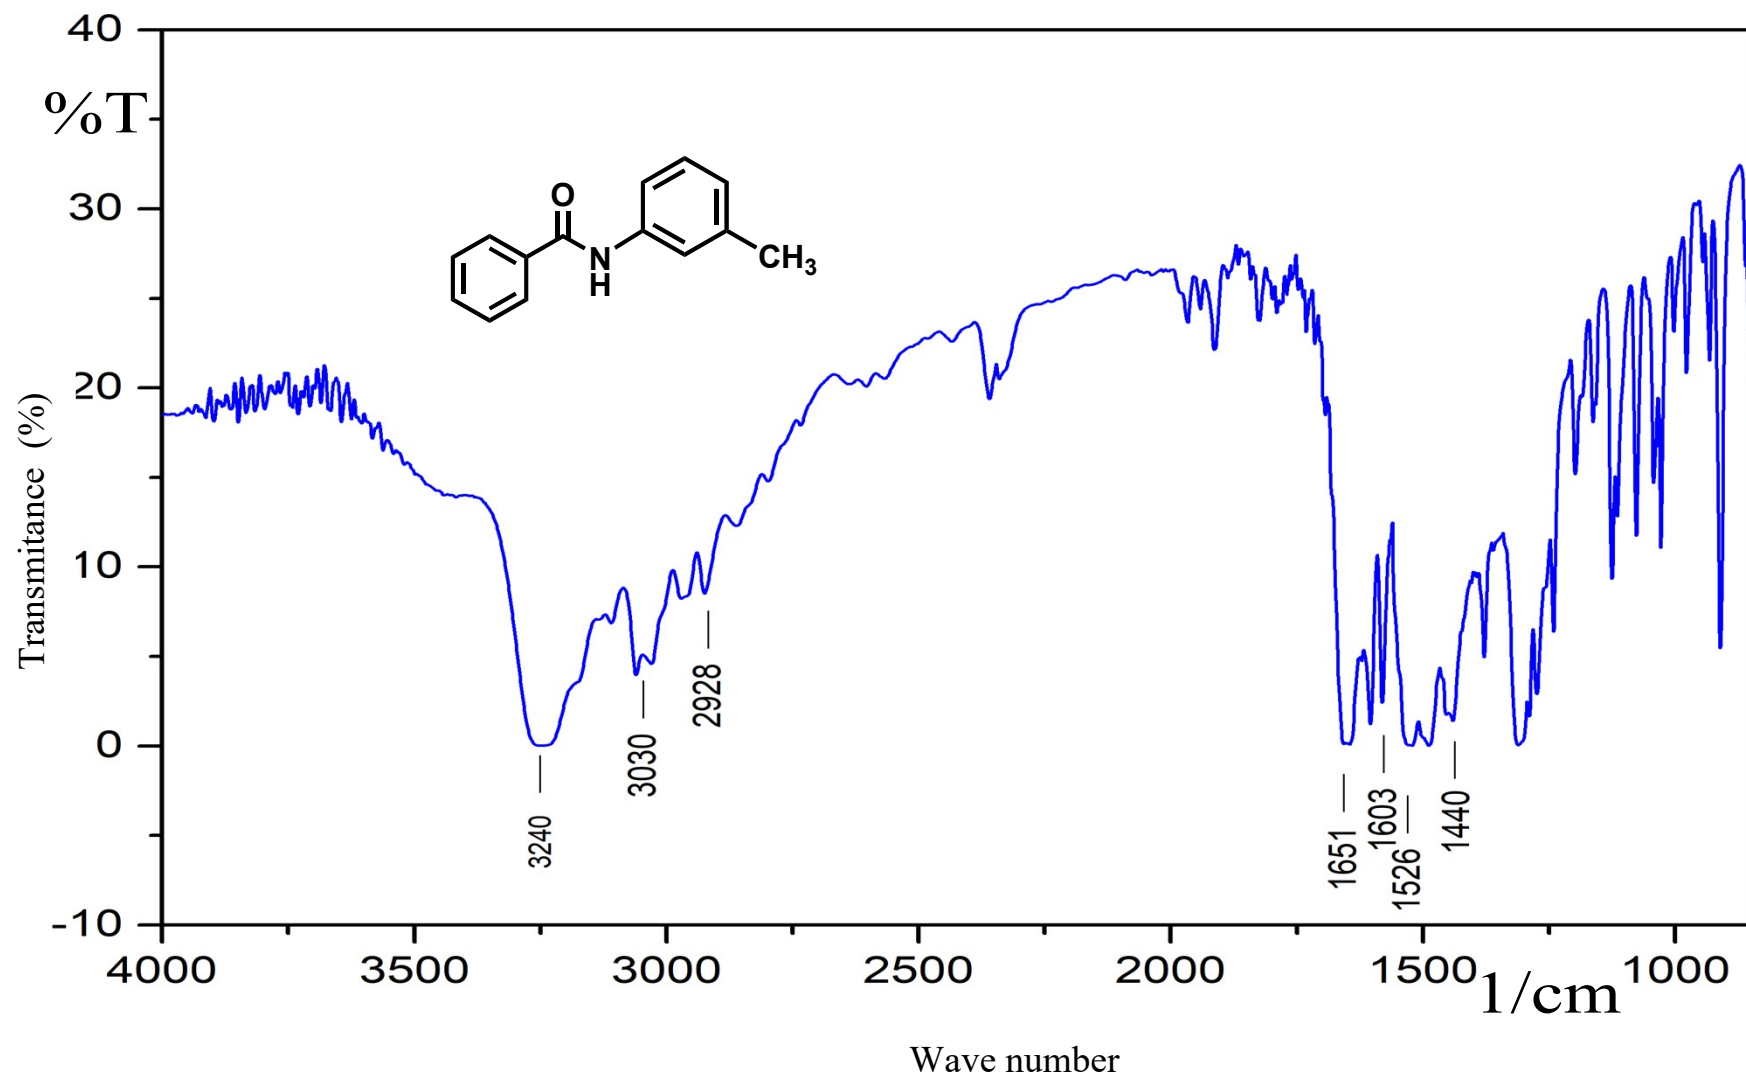

Figure S23: FT-IR spectrum of compound 4.



Wazed Miah Science Research Centre (WMSRC)  
 Jahanginagar University  
 Sample: ME  
 Operated by: Md. Emdad Hossain, Scientist

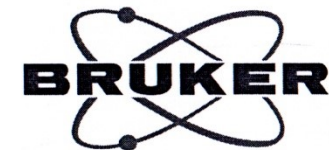

Current Data Parameters  
 NAME BUET\_ME  
 EXPNO 1  
 PROCNO 1

F2 - Acquisition Parameters  
 Date\_ 20200223  
 Time\_ 10.53  
 INSTRUM spect  
 PROBHD 5 mm PABBO BB/  
 PULPROG zg  
 TD 65536  
 SOLVENT CDCl3  
 NS 16  
 DS 0  
 SWH 12019.230 Hz  
 FIDRES 0.183399 Hz  
 AQ 2.7262976 sec  
 RG 93.48  
 DW 41.600 usec  
 DE 6.50 usec  
 TE 298.0 K  
 D1 1.00000000 sec  
 TDO 1

==== CHANNEL f1 =====  
 SFO1 400.2340023 MHz  
 NUC1 1H  
 P1 11.20 usec  
 PLW1 12.00000000 W

F2 - Processing parameters  
 SI 131072  
 SF 400.2300000 MHz  
 WDW EM  
 SSB 0  
 LB 1.00 Hz  
 GB 0  
 PC 1.00

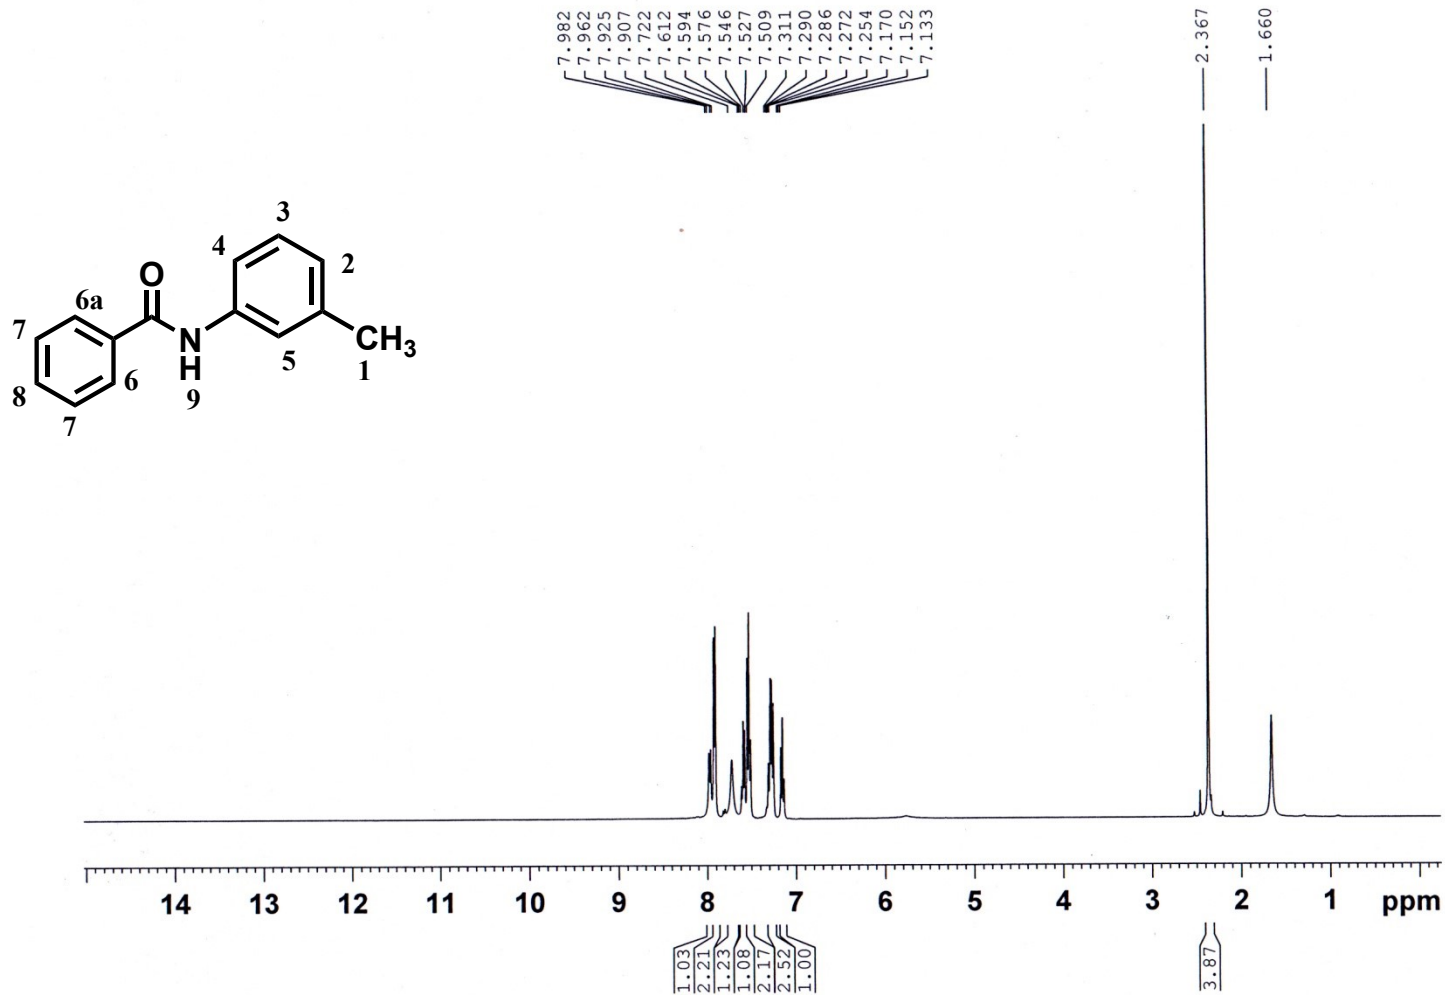

Figure S24: <sup>1</sup>H-NMR spectrum of compound 4

Wazed Miah Science Research Centre (WMSRC)  
 Jahanginagar University  
 Sample: ME  
 Operated by: Md. Emdad Hossain, Scientist

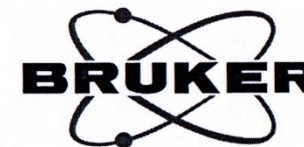

Current Data Parameters  
 NAME BUET\_ME  
 EXPNO 1  
 PROCNO 1

F2 - Acquisition Parameters  
 Date\_ 20200223  
 Time\_ 10.53  
 INSTRUM spect  
 PROBHD 5 mm PABBO BB/  
 PULPROG zg  
 TD 65536  
 SOLVENT CDCl3  
 NS 16  
 DS 0  
 SWH 12019.230 Hz  
 FIDRES 0.183399 Hz  
 AQ 2.7262976 sec  
 RG 93.48  
 DW 41.600 usec  
 DE 6.50 usec  
 TE 298.0 K  
 D1 1.0000000 sec  
 TDO 1

===== CHANNEL f1 =====  
 SFO1 400.2340023 MHz  
 NUC1 1H  
 P1 11.20 usec  
 PLW1 12.0000000 W

F2 - Processing parameters  
 SI 131072  
 SF 400.2300000 MHz  
 WDW EM  
 SSB 0  
 LB 1.00 Hz  
 GB 0  
 PC 1.00

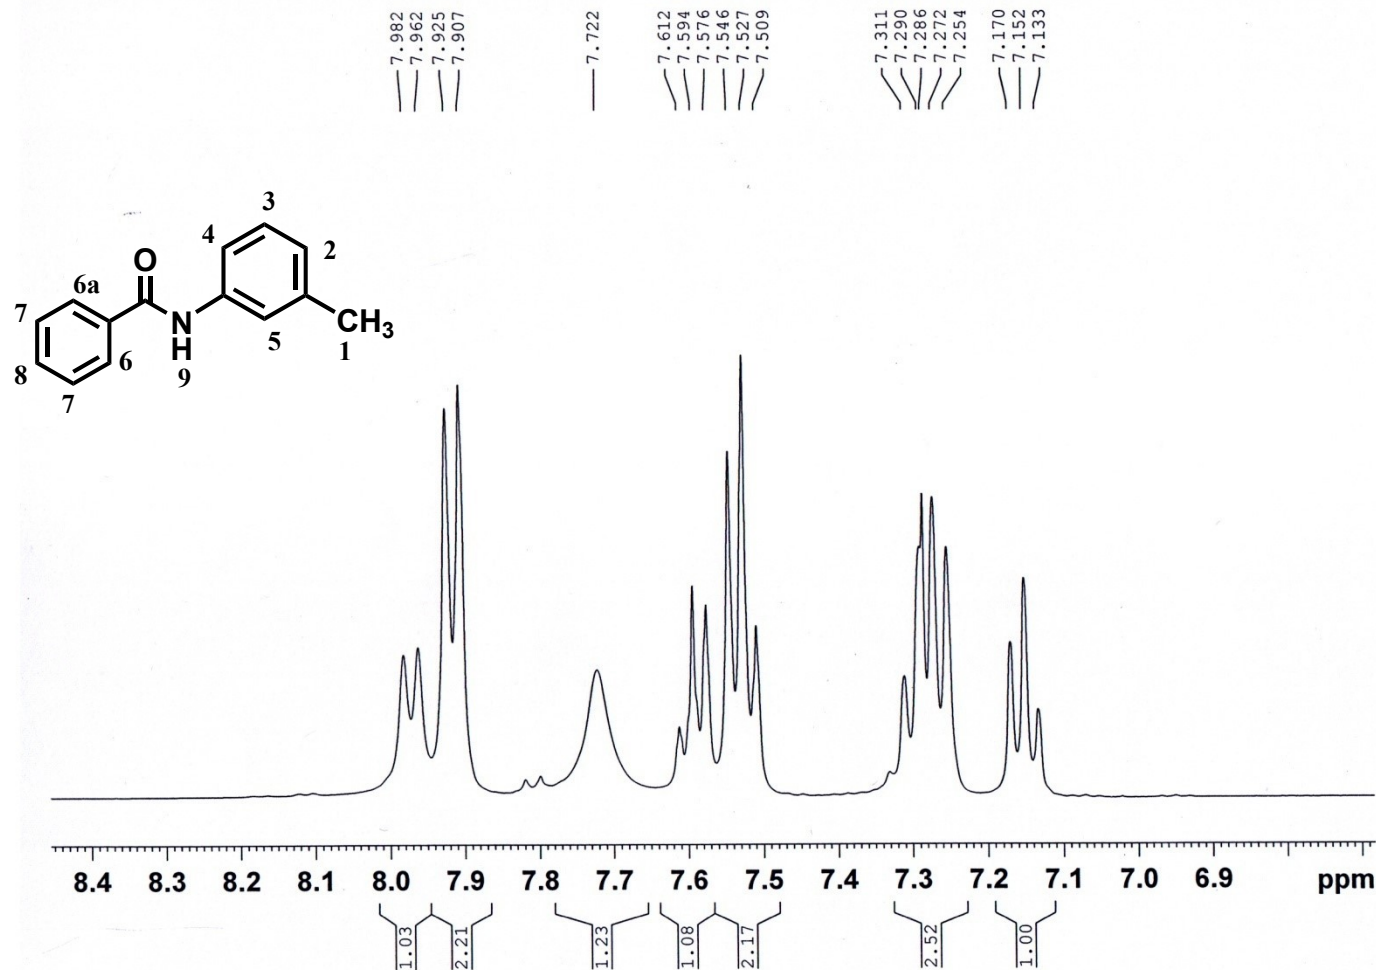

Figure S25: Extended <sup>1</sup>H-NMR spectrum of compound 4

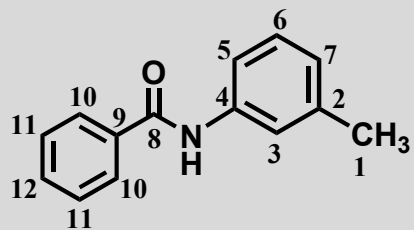

Figure S26:  $^{13}\text{C}$ -NMR spectrum of compound 4

Wazed Miah Science Research Centre (WMSRC)  
 Jahangirnagar University  
 Sample: ME, 13C  
 Operated by: Md. Emdad Hossain, Scientist

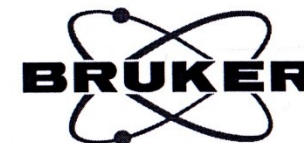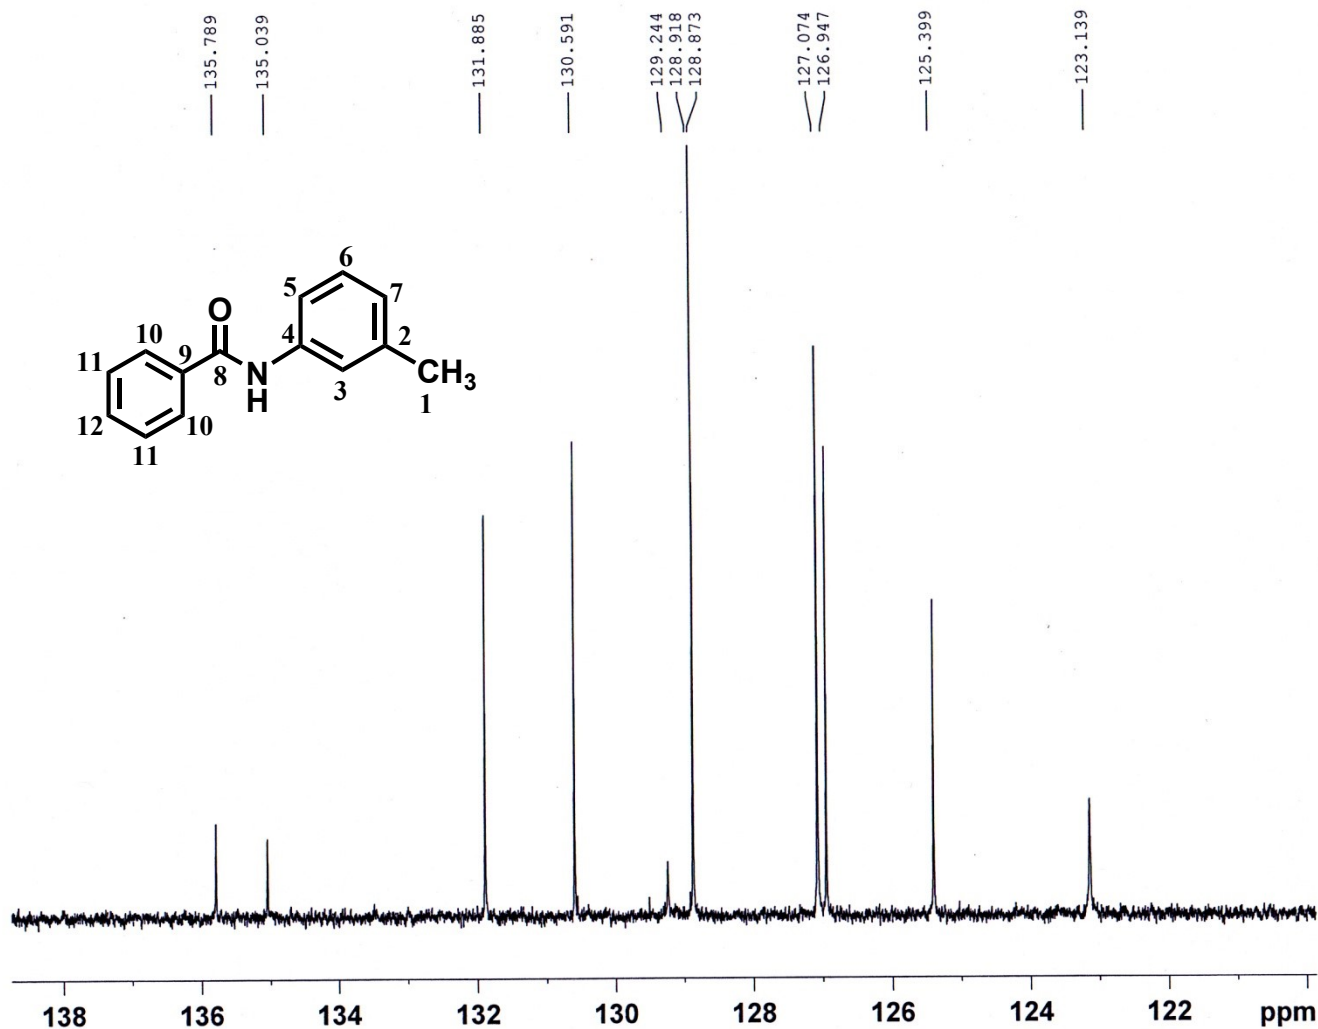

Current Data Parameters  
 NAME BUET\_ME  
 EXPNO 2  
 PROCNO 1

F2 - Acquisition Parameters  
 Date\_ 20200223  
 Time\_ 11.29  
 INSTRUM spect  
 PROBHD 5 mm PABBO BB/  
 PULPROG zgpg  
 TD 524288  
 SOLVENT CDCl3  
 NS 183  
 DS 0  
 SWH 25252.525 Hz  
 FIDRES 0.048165 Hz  
 AQ 10.3809023 sec  
 RG 208.5  
 DW 19.800 usec  
 DE 6.50 usec  
 TE 298.0 K  
 D1 1.00000000 sec  
 D11 0.03000000 sec  
 TD0 1

===== CHANNEL f1 =====  
 SFO1 100.6479778 MHz  
 NUC1 13C  
 P1 10.00 usec  
 PLW1 49.00000000 W

===== CHANNEL f2 =====  
 SFO2 400.2320011 MHz  
 NUC2 1H  
 CPDPRG[2] waltz16  
 PCPD2 90.00 usec  
 PLW2 12.00000000 W  
 PLW12 0.18584000 W  
 PLW13 0.15053000 W

F2 - Processing parameters  
 SI 1048576  
 SF 100.6379135 MHz  
 WDW EM  
 SSB 0  
 LB 0.30 Hz  
 GB 0  
 PC 1.40

Figure S27: Extended <sup>13</sup>C-NMR spectrum of compound 4

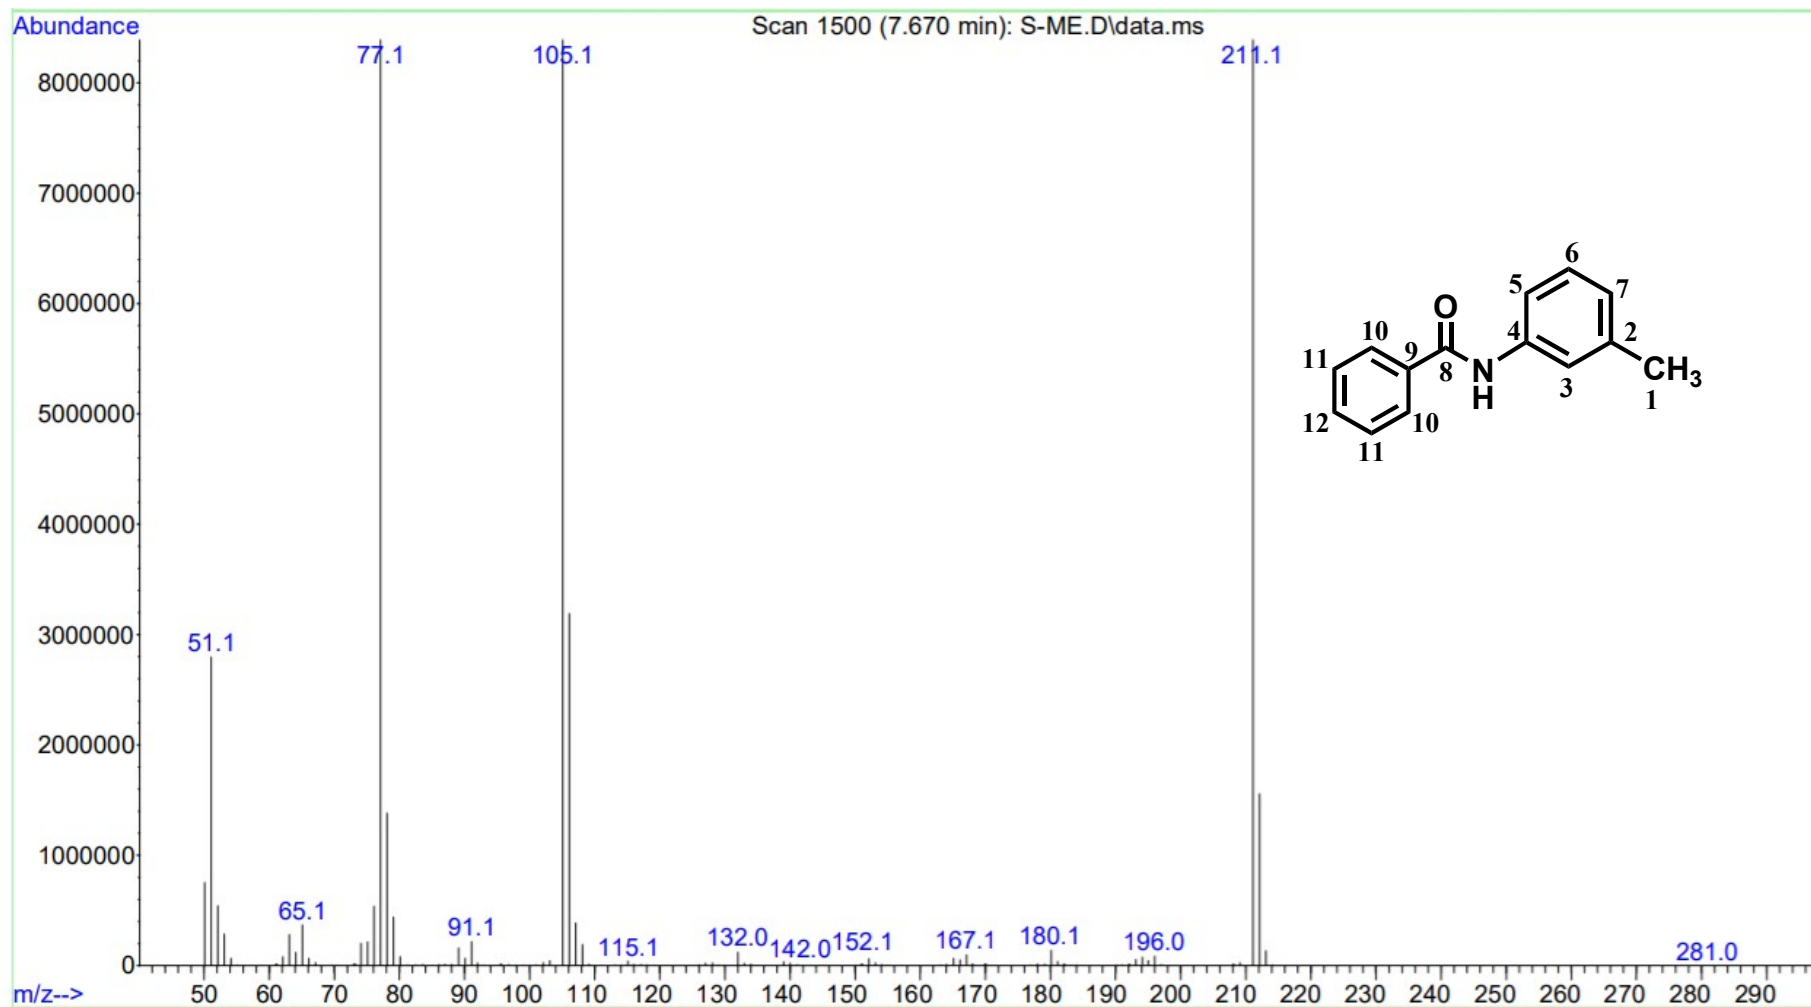

Figure S28: GC-MS spectrum of compound 4

15. Spectra of compound 5

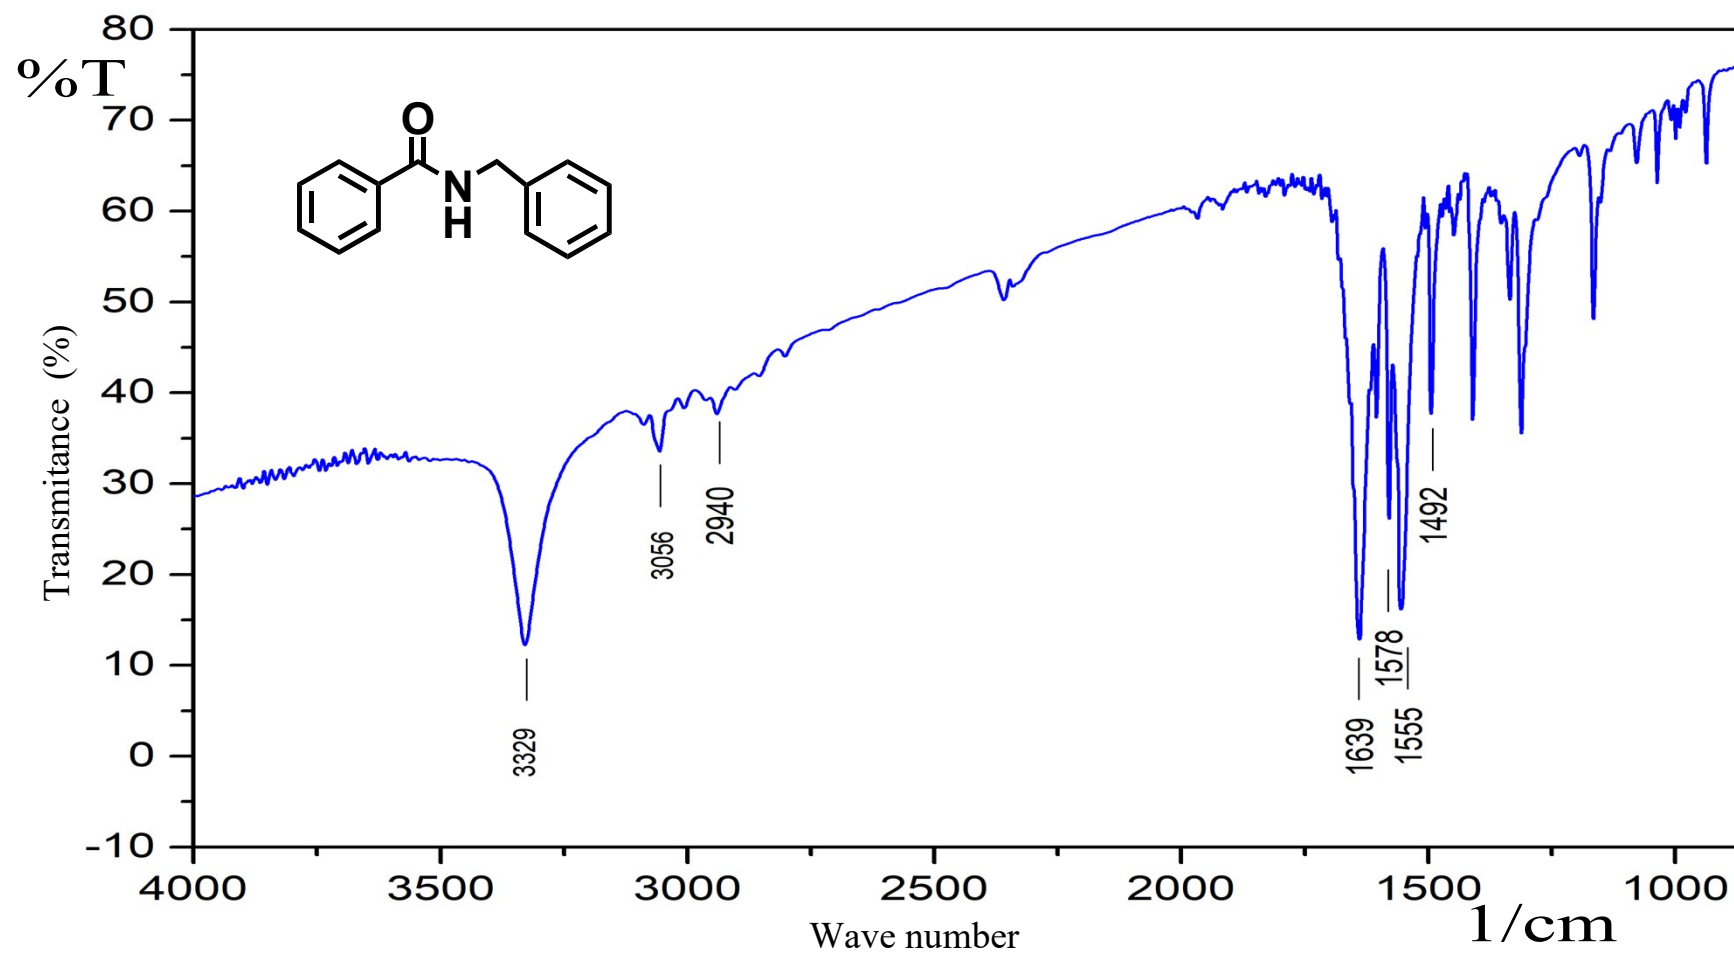

Figure S29: FT-IT spectrum of compound 5
